# Supplementary material for: Bottom-up assembly of recyclable van der Waals-integrated photocatalysts towards efficient photoelectrocatalytic degradation
Source: Royal Society of Chemistry journal article supplement (doi:10.1039/d4ta07813f), 2025-01-01
Supplement: d4ta07813f1.pdf [file d4ta07813f1.pdf]

## original data

### Bottom-up Assembly of Recyclable Van Der Waals-integrated Photocatalysts towards Efficient Photoelectrocatalytic Degradation

Hua-Jun Chen,<sup>#</sup> Zhao-Ming Lu,<sup>#</sup> Yan-Ling Yang,<sup>\*,#</sup> Xiao-Lei Shi,<sup>#</sup> Jin-Geng Chen, Ze-Nan Hu, Biying Zhang,  
Yuefeng Chen, Yu Sun, Zhi-Gang Chen<sup>\*</sup>

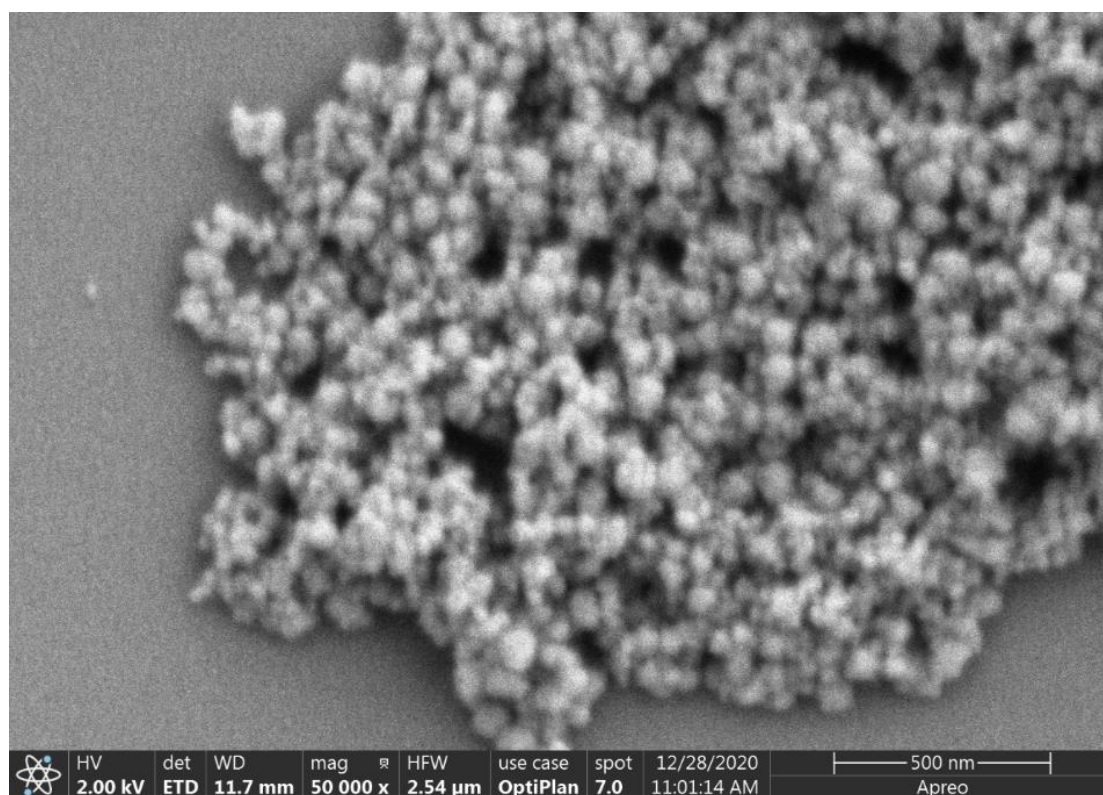

Elemental mapping of P25@AC core/shell nanospheres

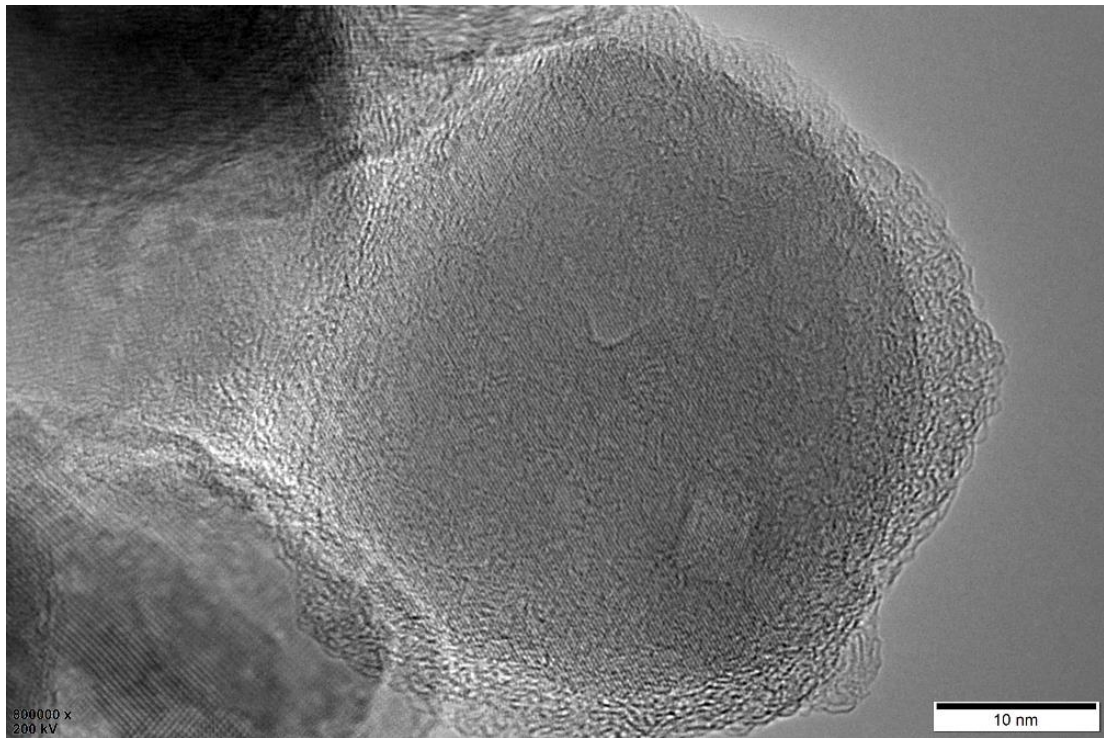

TEM image of P25@AC core/shell nanospheres

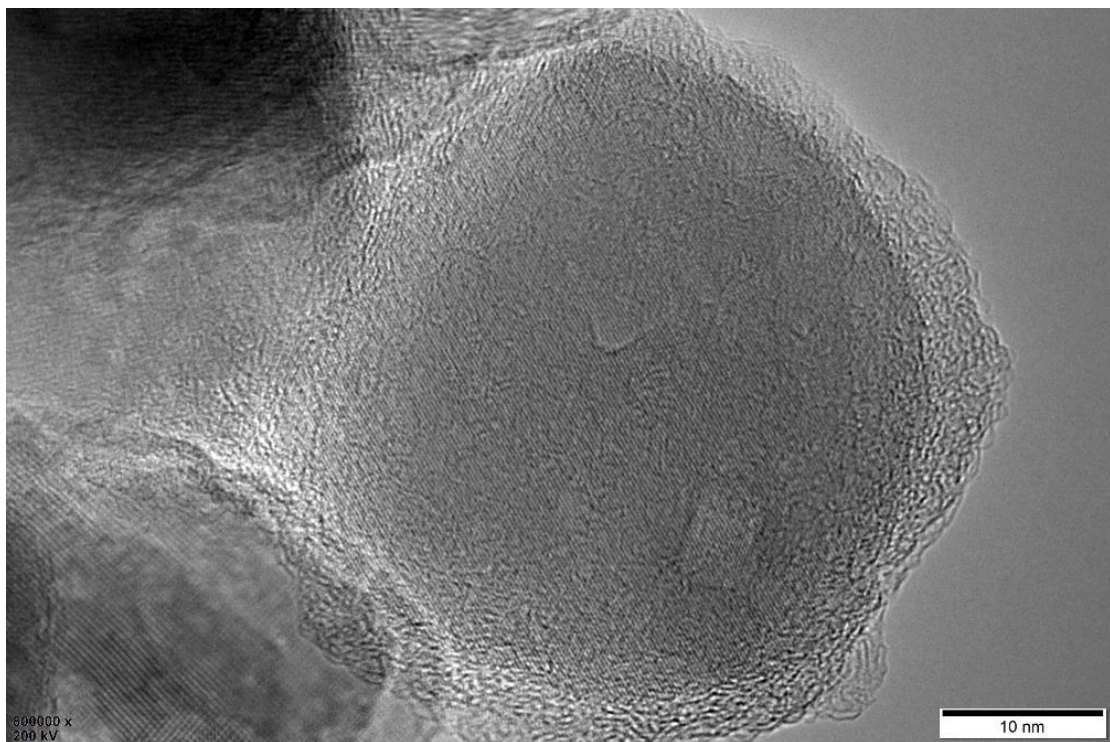

HRTEM analysis of P25@AC core/shell nanospheres

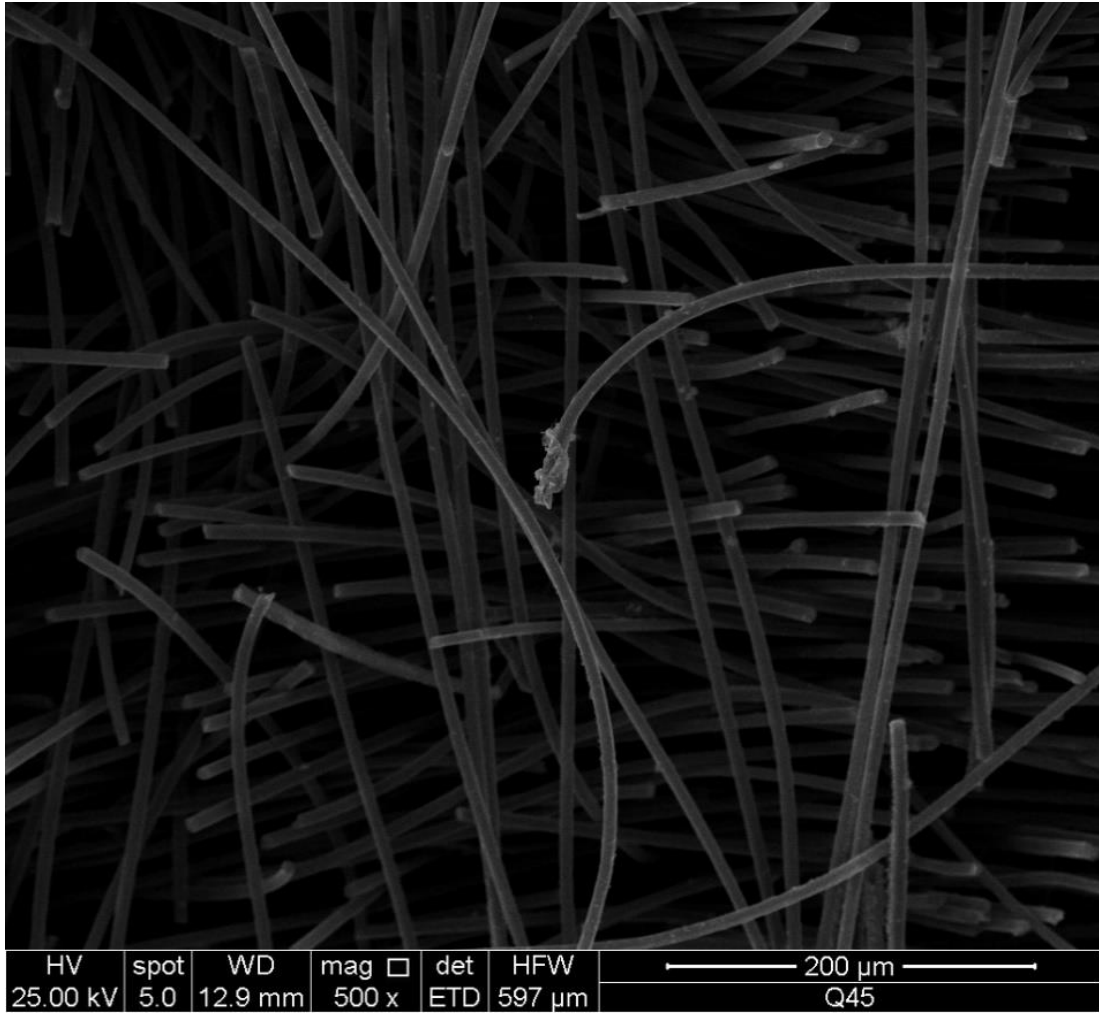

FESEM image of CTs

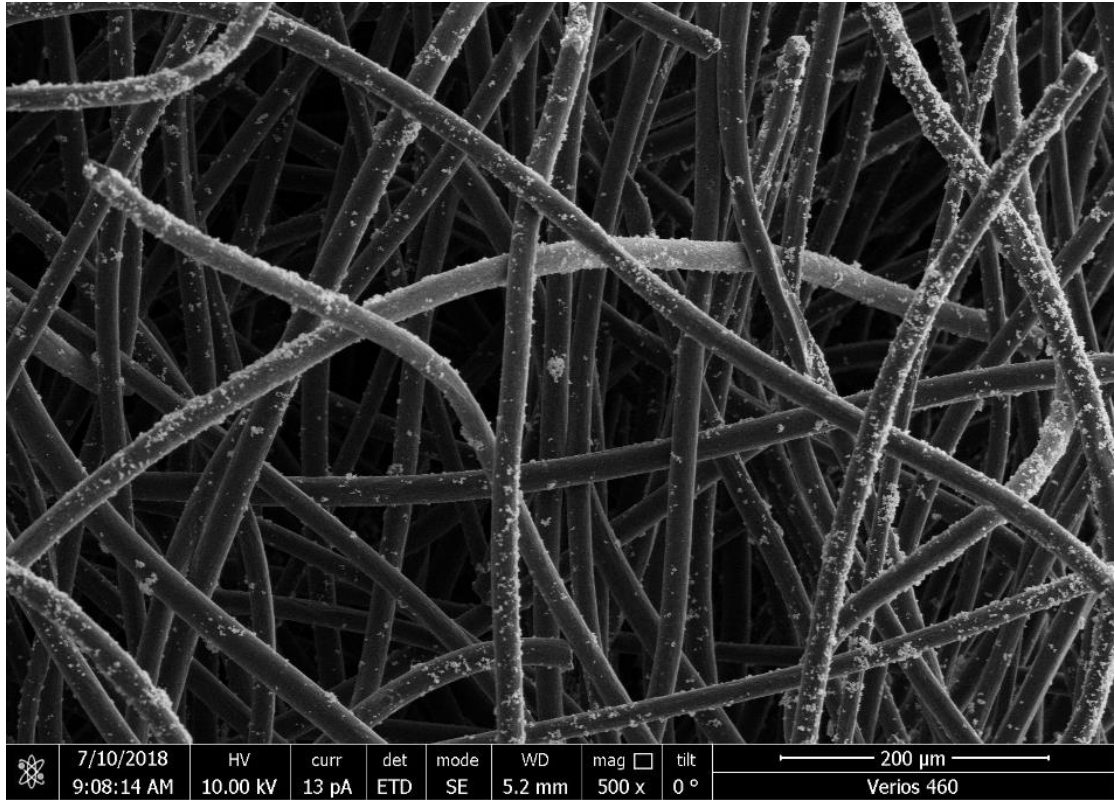

FESEM image of P25@AC/CTs

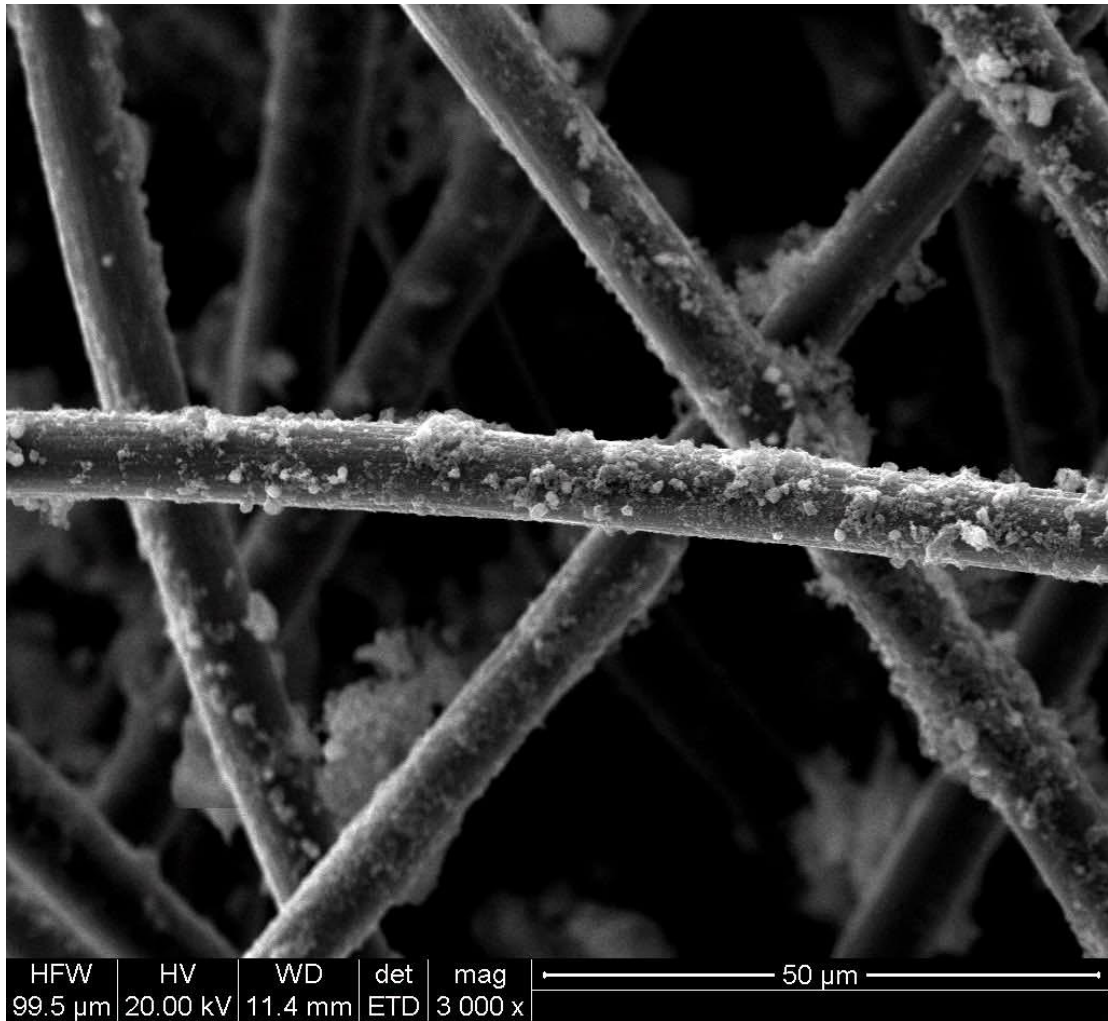

FESEM image of P25@AC/CTs

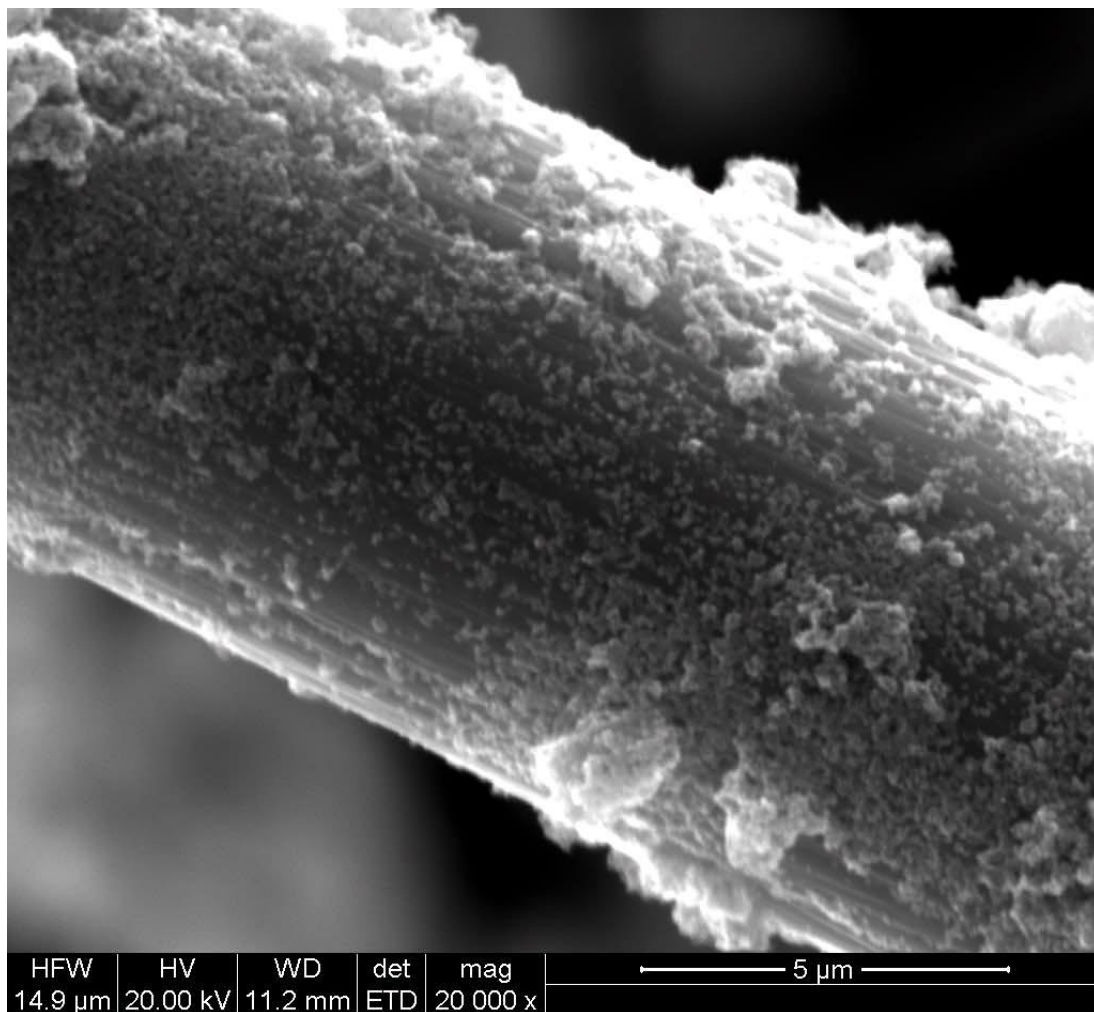

FESEM image of surface of single carbon fiber

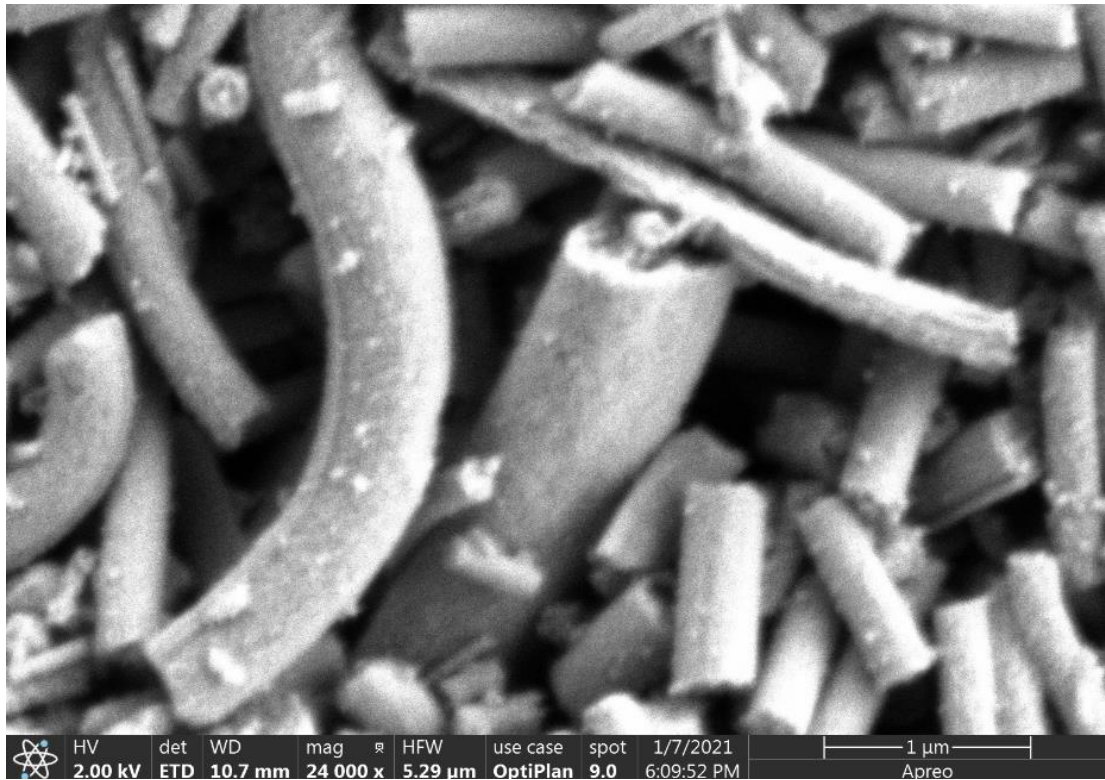

SEM analysis of TiO<sub>2</sub>@AC core/shell fibers

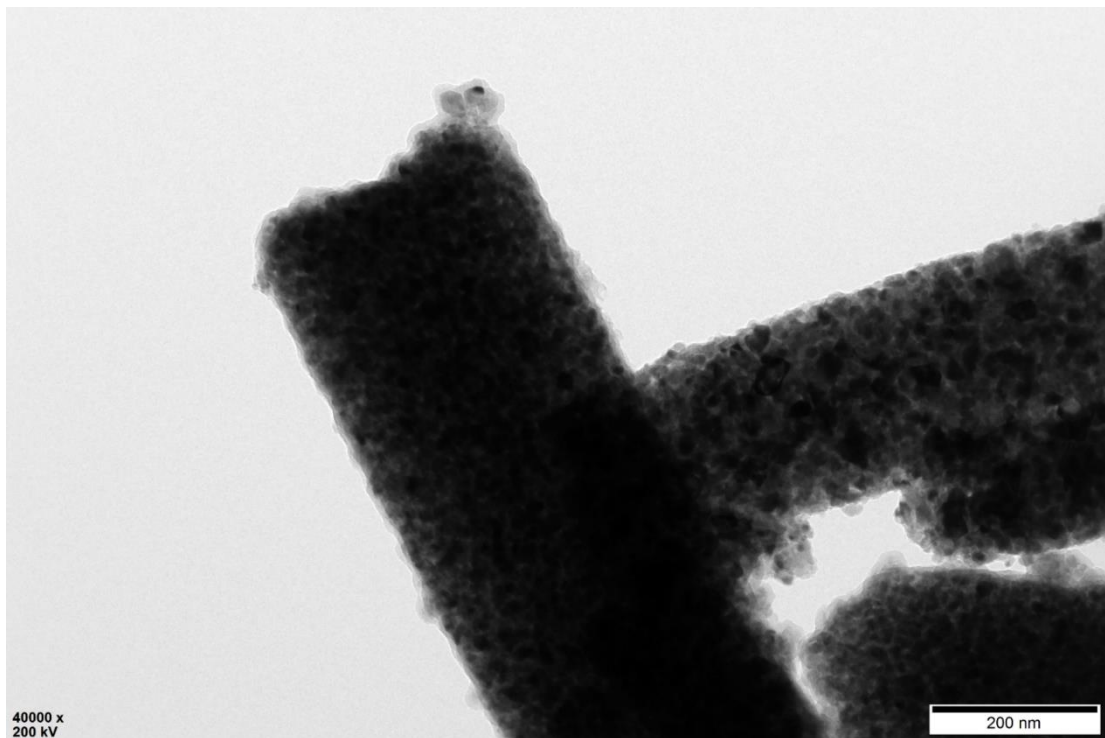

TEM analysis of TiO<sub>2</sub>@AC core/shell fibers

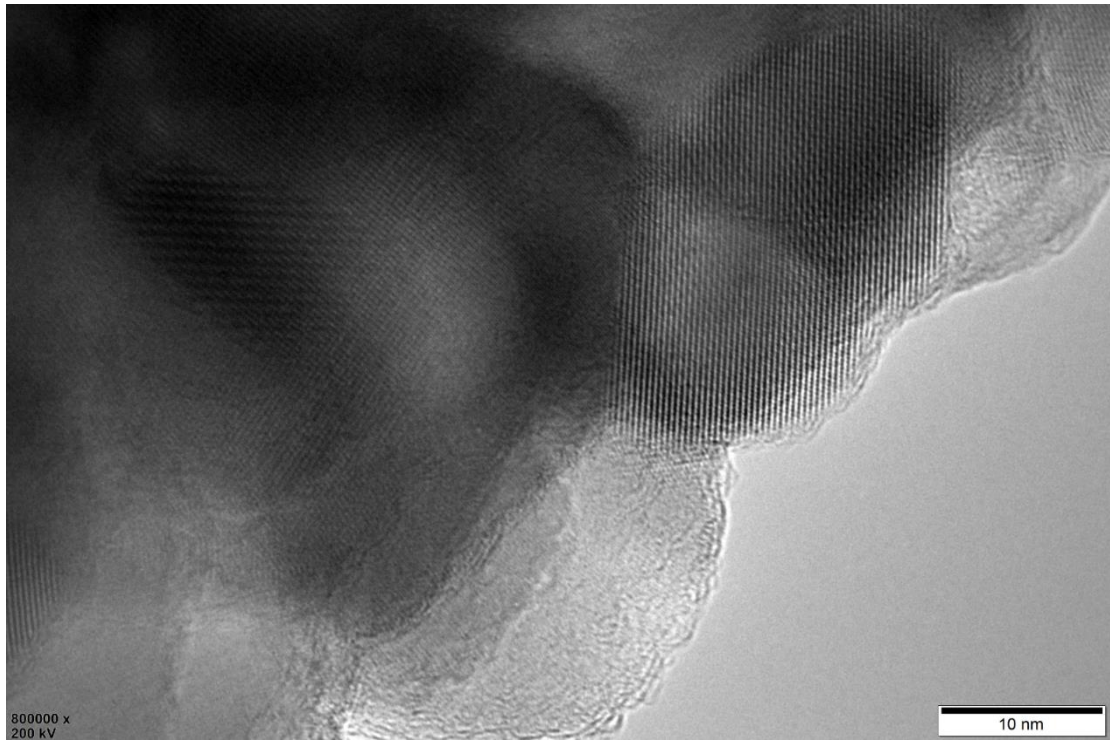

HRTEM analysis of TiO<sub>2</sub>@AC core/shell fibers



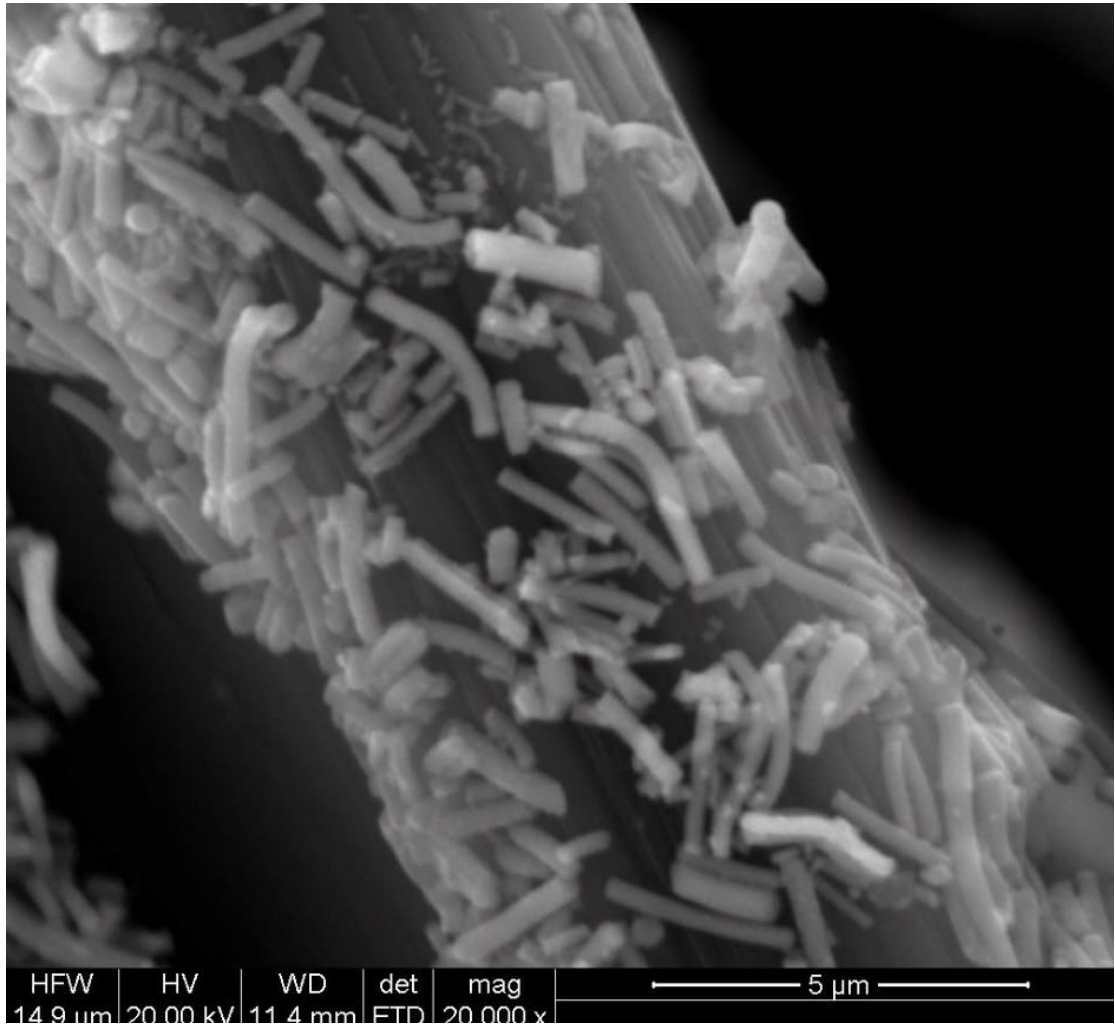

SEM analysis of TiO<sub>2</sub>@AC/CTs

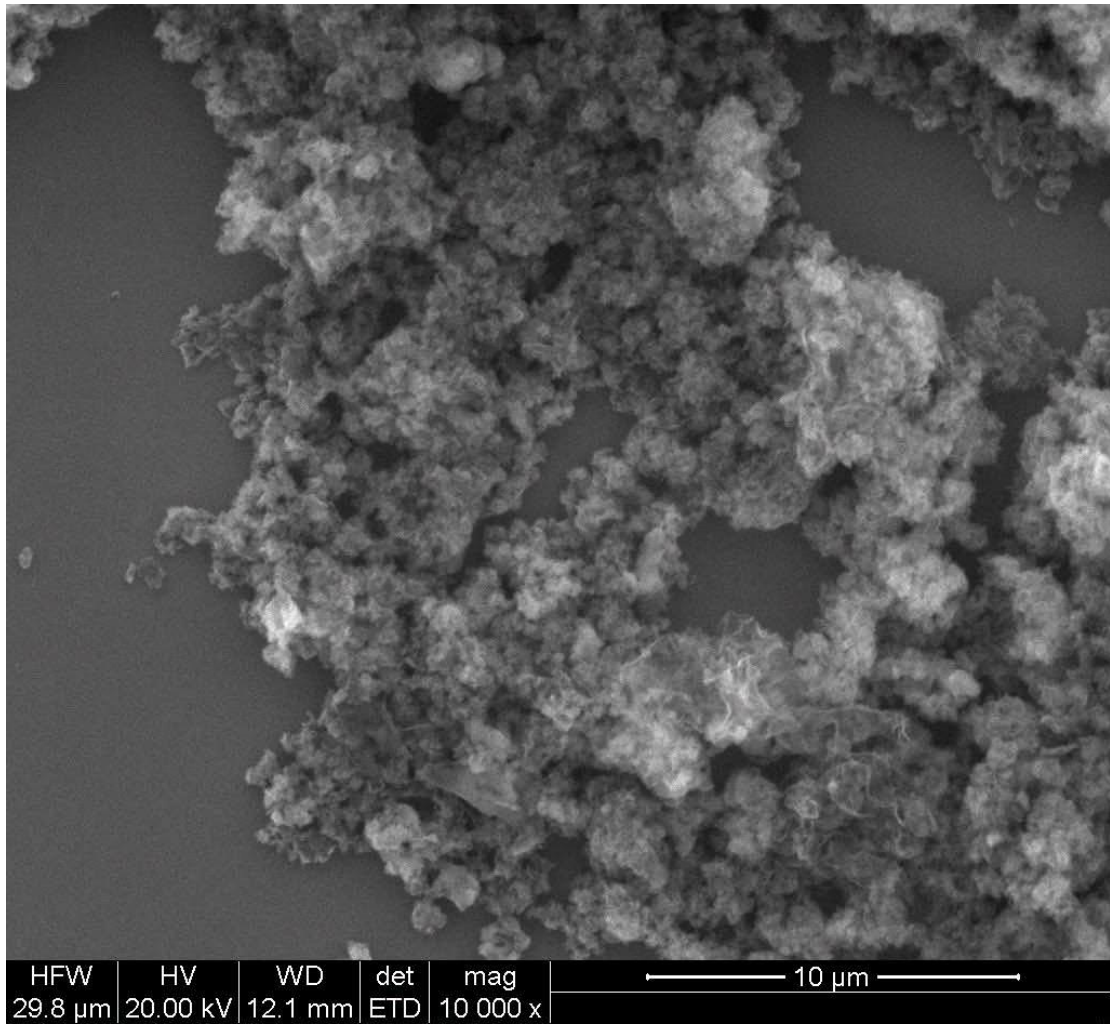

SEM image of g-C<sub>3</sub>N<sub>4</sub> nanosheets

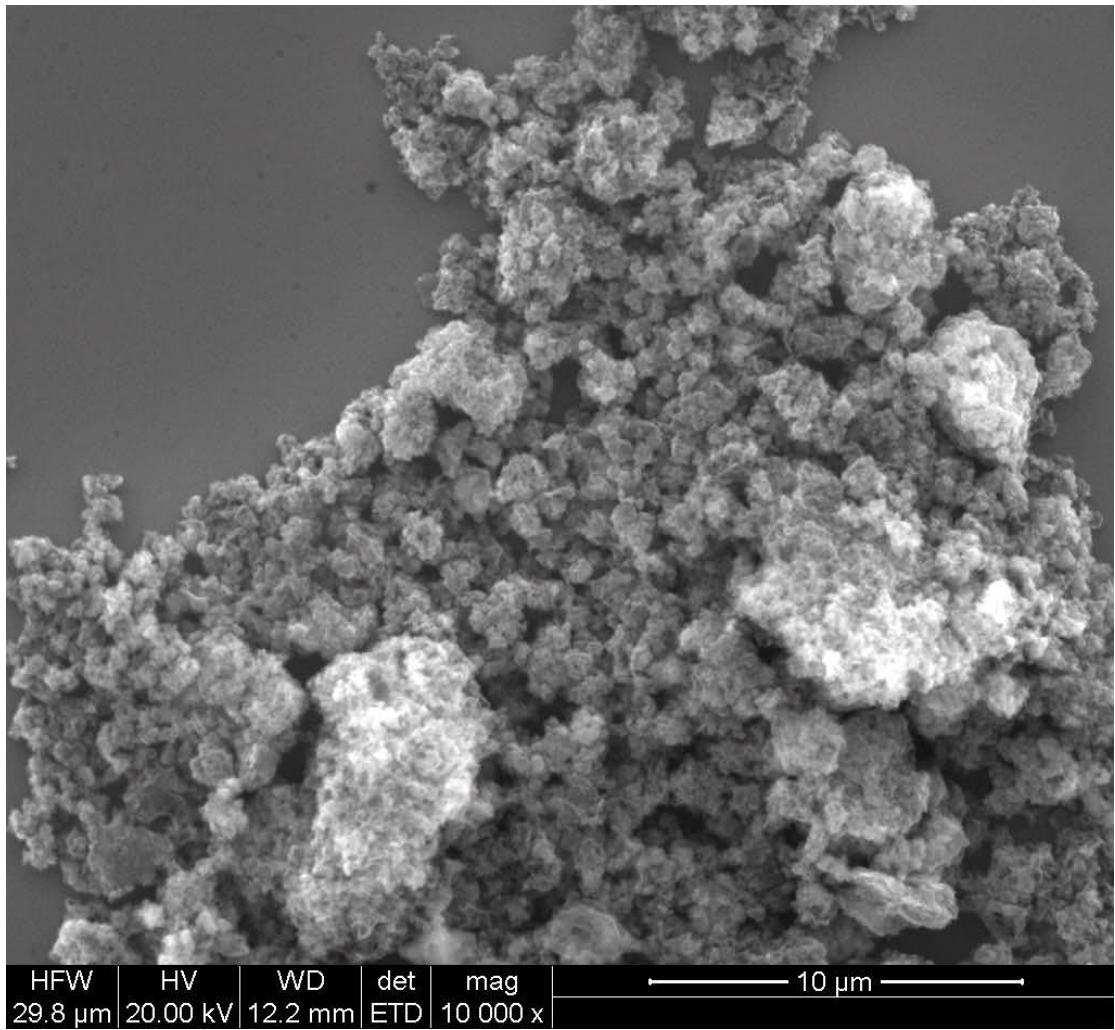

SEM image of g-C<sub>3</sub>N<sub>4</sub>@AC core/shell nanosheets

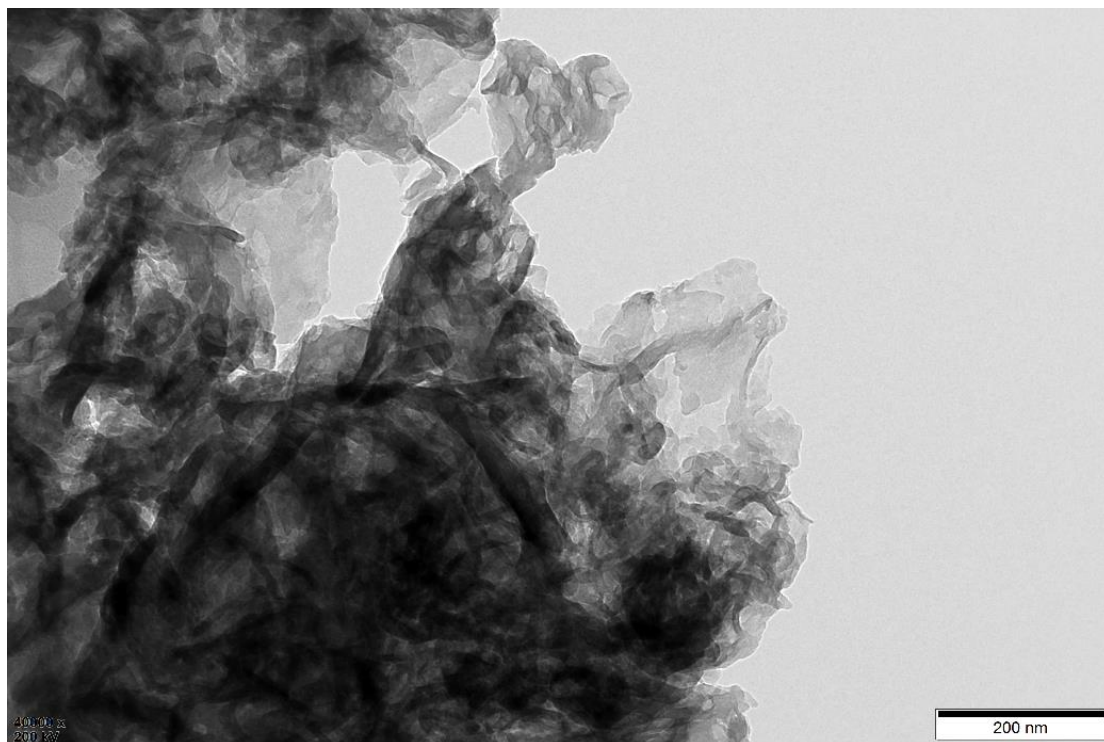

TEM analysis of g-C<sub>3</sub>N<sub>4</sub>@AC core/shell nanosheets

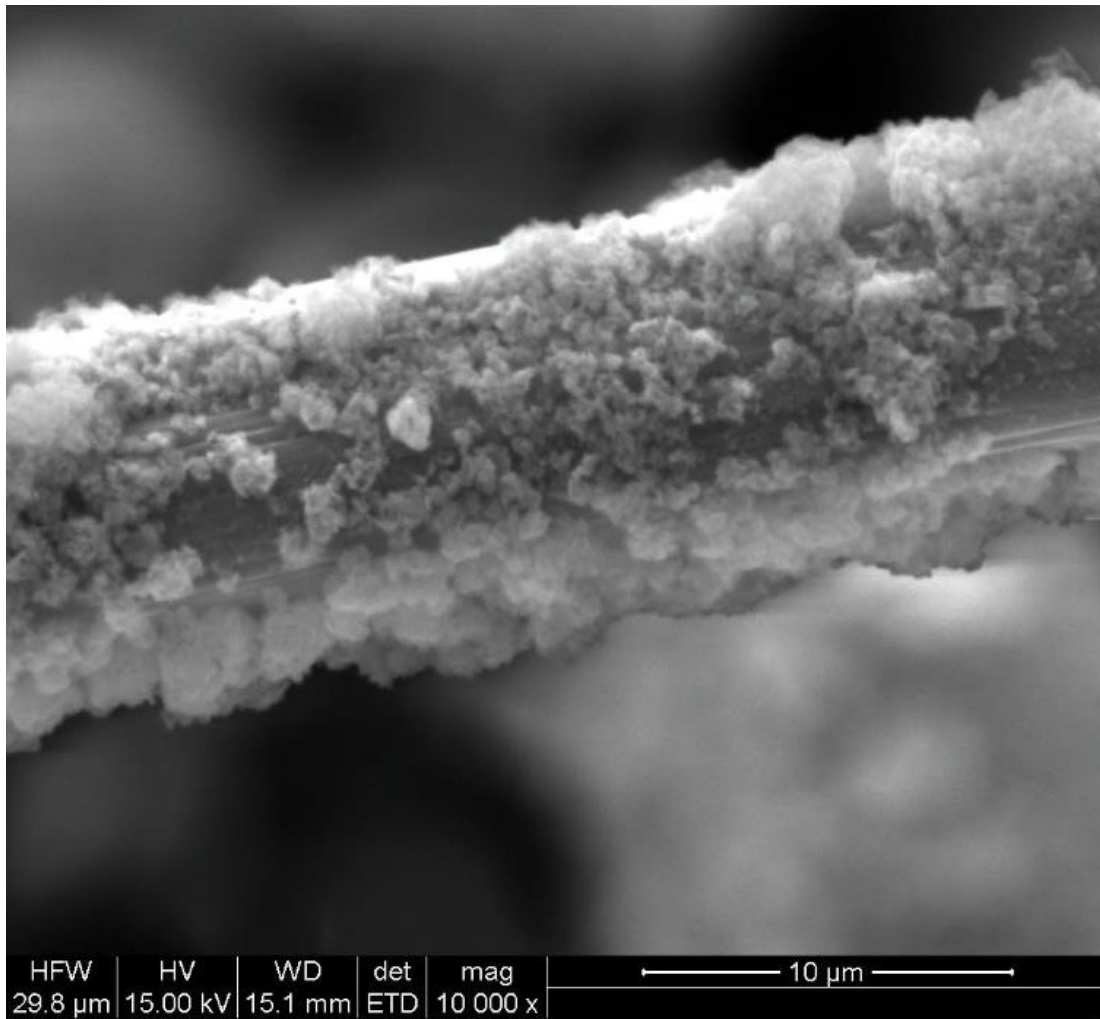

SEM analysis of g-C<sub>3</sub>N<sub>4</sub>@AC/CTs

XRD pattern (a) and FESEM images

15 1 15 2

15.02 1 15.02 2

15.04 1 15.04 2

15.06 1 15.06 2

15.08 1 15.08 2

15.1 1 15.1 3

15.12 1 15.12 3

15.14 2 15.14 3  
15.16 2 15.16 3  
15.18 2 15.18 3  
15.2 2 15.2 3  
15.22 2 15.22 2  
15.24 2 15.24 2  
15.26 2 15.26 3  
15.28 2 15.28 3  
15.3 2 15.3 3  
15.32 2 15.32 2  
15.34 2 15.34 2  
15.36 2 15.36 3  
15.38 2 15.38 3  
15.4 2 15.4 3  
15.42 2 15.42 3  
15.44 2 15.44 3  
15.46 2 15.46 2  
15.48 2 15.48 3  
15.5 2 15.5 3  
15.52 2 15.52 3  
15.54 2 15.54 3  
15.56 2 15.56 3

15.58 2 15.58 3  
15.6 2 15.6 2  
15.62 2 15.62 3  
15.64 2 15.64 3  
15.66 2 15.66 3  
15.68 2 15.68 3  
15.7 2 15.7 3  
15.72 2 15.72 3  
15.74 2 15.74 3  
15.76 2 15.76 3  
15.78 1 15.78 3  
15.8 2 15.8 3  
15.82 1 15.82 3  
15.84 1 15.84 3  
15.86 1 15.86 3  
15.88 0 15.88 2  
15.9 1 15.9 2  
15.92 1 15.92 1  
15.94 2 15.94 1  
15.96 2 15.96 1  
15.98 2 15.98 1  
16 2 16 2

16.02 2 16.02 2  
16.04 2 16.04 2  
16.06 2 16.06 2  
16.08 2 16.08 3  
16.1 2 16.1 3  
16.12 1 16.12 3  
16.14 2 16.14 3  
16.16 1 16.16 3  
16.18 1 16.18 2  
16.2 2 16.2 2  
16.22 2 16.22 2  
16.24 2 16.24 2  
16.26 2 16.26 2  
16.28 2 16.28 3  
16.3 2 16.3 3  
16.32 2 16.32 3  
16.34 2 16.34 3  
16.36 2 16.36 3  
16.38 2 16.38 3  
16.4 1 16.4 2  
16.42 1 16.42 2  
16.44 1 16.44 1



16.46 1 16.46 1  
16.48 2 16.48 1  
16.5 2 16.5 1  
16.52 2 16.52 1  
16.54 2 16.54 1  
16.56 2 16.56 1  
16.58 2 16.58 2  
16.6 2 16.6 2  
16.62 2 16.62 2  
16.64 2 16.64 2  
16.66 2 16.66 2  
16.68 2 16.68 2  
16.7 2 16.7 2  
16.72 2 16.72 2  
16.74 3 16.74 2  
16.76 3 16.76 2  
16.78 3 16.78 2  
16.8 2 16.8 2  
16.82 2 16.82 2  
16.84 2 16.84 2  
16.86 2 16.86 2  
16.88 2 16.88 1

16.9 1 16.9 1  
16.92 1 16.92 1  
16.94 1 16.94 1  
16.96 1 16.96 2  
16.98 1 16.98 2  
17 1 17 3  
17.02 2 17.02 3  
17.04 2 17.04 2  
17.06 2 17.06 2  
17.08 1 17.08 3  
17.1 1 17.1 3  
17.12 1 17.12 3  
17.14 1 17.14 2  
17.16 2 17.16 2  
17.18 2 17.18 2  
17.2 2 17.2 2  
17.22 2 17.22 2  
17.24 2 17.24 3  
17.26 2 17.26 3  
17.28 2 17.28 3  
17.3 2 17.3 3  
17.32 2 17.32 2

17.34 2 17.34 3  
17.36 1 17.36 3  
17.38 1 17.38 3  
17.4 1 17.4 2  
17.42 1 17.42 2  
17.44 2 17.44 2  
17.46 2 17.46 2  
17.48 2 17.48 2  
17.5 3 17.5 2  
17.52 2 17.52 2  
17.54 2 17.54 1  
17.56 2 17.56 1  
17.58 3 17.58 2  
17.6 3 17.6 2  
17.62 2 17.62 2  
17.64 2 17.64 2  
17.66 2 17.66 2  
17.68 2 17.68 2  
17.7 2 17.7 3  
17.72 2 17.72 3  
17.74 2 17.74 3  
17.76 2 17.76 2

17.78 2 17.78 2  
17.8 1 17.8 2  
17.82 2 17.82 1  
17.84 2 17.84 2  
17.86 2 17.86 2  
17.88 2 17.88 2  
17.9 2 17.9 2  
17.92 2 17.92 2  
17.94 2 17.94 2  
17.96 1 17.96 2  
17.98 1 17.98 2  
18 1 18 2  
18.02 1 18.02 2  
18.04 1 18.04 2  
18.06 1 18.06 3  
18.08 1 18.08 3  
18.1 1 18.1 3  
18.12 1 18.12 3  
18.14 1 18.14 2  
18.16 1 18.16 3  
18.18 1 18.18 3  
18.2 1 18.2 3

18.22 1 18.22 3  
18.24 1 18.24 2  
18.26 1 18.26 2  
18.28 1 18.28 2  
18.3 1 18.3 2  
18.32 1 18.32 3  
18.34 2 18.34 3  
18.36 2 18.36 3  
18.38 2 18.38 3  
18.4 2 18.4 2  
18.42 2 18.42 2  
18.44 2 18.44 2  
18.46 2 18.46 2  
18.48 2 18.48 2  
18.5 2 18.5 2  
18.52 2 18.52 2  
18.54 1 18.54 2  
18.56 2 18.56 2  
18.58 1 18.58 2  
18.6 1 18.6 2  
18.62 1 18.62 3  
18.64 1 18.64 3

18.66 1 18.66 3

18.68 1 18.68 4

18.7 1 18.7 4

18.72 1 18.72 4

18.74 1 18.74 3

18.76 1 18.76 3

18.78 1 18.78 3

18.8 2 18.8 3

18.82 2 18.82 3

18.84 2 18.84 3

18.86 2 18.86 2

18.88 2 18.88 3

18.9 2 18.9 2

18.92 2 18.92 3

18.94 1 18.94 3

18.96 1 18.96 4

18.98 1 18.98 4

19 1 19 4

19.02 1 19.02 3

19.04 1 19.04 3

19.06 1 19.06 3

19.08 2 19.08 3

19.1 2 19.1 3  
19.12 2 19.12 2  
19.14 2 19.14 2  
19.16 2 19.16 2  
19.18 2 19.18 2  
19.2 1 19.2 2  
19.22 1 19.22 2  
19.24 1 19.24 2  
19.26 1 19.26 2  
19.28 1 19.28 2  
19.3 1 19.3 2  
19.32 1 19.32 2  
19.34 1 19.34 3  
19.36 1 19.36 3  
19.38 1 19.38 3  
19.4 1 19.4 3  
19.42 1 19.42 3  
19.44 1 19.44 3  
19.46 1 19.46 3  
19.48 1 19.48 3  
19.5 1 19.5 3  
19.52 1 19.52 3

19.54 1 19.54 3  
19.56 1 19.56 3  
19.58 1 19.58 3  
19.6 1 19.6 3  
19.62 1 19.62 3  
19.64 1 19.64 3  
19.66 1 19.66 3  
19.68 1 19.68 3  
19.7 1 19.7 3  
19.72 1 19.72 3  
19.74 1 19.74 2  
19.76 1 19.76 2  
19.78 1 19.78 2  
19.8 1 19.8 2  
19.82 1 19.82 2  
19.84 1 19.84 2  
19.86 1 19.86 2  
19.88 1 19.88 2  
19.9 2 19.9 2  
19.92 1 19.92 2  
19.94 2 19.94 2  
19.96 2 19.96 2



19.98 2 19.98 2

20 2 20 2

20.02 2 20.02 2

20.04 2 20.04 2

20.06 2 20.06 2

20.08 2 20.08 2

20.1 2 20.1 2

20.12 2 20.12 2

20.14 1 20.14 2

20.16 1 20.16 2

20.18 1 20.18 2

20.2 1 20.2 2

20.22 1 20.22 2

20.24 1 20.24 2

20.26 1 20.26 2

20.28 1 20.28 2

20.3 1 20.3 2

20.32 1 20.32 2

20.34 1 20.34 2

20.36 2 20.36 2

20.38 2 20.38 2

20.4 2 20.4 2

20.42 2 20.42 2  
20.44 2 20.44 3  
20.46 2 20.46 3  
20.48 2 20.48 2  
20.5 2 20.5 3  
20.52 2 20.52 3  
20.54 2 20.54 3  
20.56 2 20.56 3  
20.58 1 20.58 3  
20.6 1 20.6 3  
20.62 1 20.62 3  
20.64 1 20.64 3  
20.66 1 20.66 3  
20.68 1 20.68 3  
20.7 1 20.7 3  
20.72 2 20.72 3  
20.74 2 20.74 3  
20.76 2 20.76 2  
20.78 2 20.78 2  
20.8 2 20.8 2  
20.82 1 20.82 1  
20.84 1 20.84 2

20.86 1 20.86 2  
20.88 1 20.88 1  
20.9 1 20.9 1  
20.92 1 20.92 1  
20.94 1 20.94 2  
20.96 1 20.96 2  
20.98 1 20.98 2  
21 2 21 2  
21.02 2 21.02 3  
21.04 2 21.04 3  
21.06 2 21.06 3  
21.08 2 21.08 3  
21.1 2 21.1 3  
21.12 2 21.12 3  
21.14 1 21.14 2  
21.16 1 21.16 2  
21.18 1 21.18 2  
21.2 1 21.2 2  
21.22 1 21.22 2  
21.24 1 21.24 2  
21.26 1 21.26 1  
21.28 1 21.28 1

21.3 1 21.3 2  
21.32 1 21.32 2  
21.34 1 21.34 2  
21.36 1 21.36 2  
21.38 1 21.38 2  
21.4 1 21.4 2  
21.42 2 21.42 2  
21.44 2 21.44 2  
21.46 2 21.46 2  
21.48 2 21.48 2  
21.5 2 21.5 1  
21.52 2 21.52 1  
21.54 2 21.54 1  
21.56 2 21.56 1  
21.58 2 21.58 1  
21.6 2 21.6 1  
21.62 1 21.62 1  
21.64 1 21.64 1  
21.66 1 21.66 1  
21.68 1 21.68 1  
21.7 1 21.7 2  
21.72 1 21.72 2

21.74 1 21.74 2  
21.76 1 21.76 2  
21.78 1 21.78 1  
21.8 1 21.8 1  
21.82 1 21.82 1  
21.84 2 21.84 1  
21.86 2 21.86 1  
21.88 2 21.88 2  
21.9 2 21.9 2  
21.92 1 21.92 2  
21.94 2 21.94 2  
21.96 2 21.96 2  
21.98 2 21.98 2  
22 2 22 2  
22.02 2 22.02 2  
22.04 2 22.04 1  
22.06 2 22.06 1  
22.08 1 22.08 1  
22.1 1 22.1 2  
22.12 1 22.12 2  
22.14 1 22.14 2  
22.16 1 22.16 2

22.18 1 22.18 2  
22.2 1 22.2 2  
22.22 1 22.22 2  
22.24 1 22.24 2  
22.26 1 22.26 1  
22.28 1 22.28 1  
22.3 1 22.3 1  
22.32 1 22.32 1  
22.34 1 22.34 1  
22.36 1 22.36 1  
22.38 2 22.38 1  
22.4 1 22.4 1  
22.42 1 22.42 1  
22.44 1 22.44 1  
22.46 1 22.46 2  
22.48 1 22.48 2  
22.5 1 22.5 2  
22.52 1 22.52 3  
22.54 1 22.54 3  
22.56 1 22.56 2  
22.58 1 22.58 3  
22.6 1 22.6 3

22.62 1 22.62 3  
22.64 1 22.64 2  
22.66 1 22.66 2  
22.68 1 22.68 2  
22.7 1 22.7 2  
22.72 2 22.72 2  
22.74 1 22.74 2  
22.76 1 22.76 2  
22.78 1 22.78 3  
22.8 1 22.8 2  
22.82 1 22.82 2  
22.84 1 22.84 2  
22.86 1 22.86 3  
22.88 1 22.88 2  
22.9 2 22.9 2  
22.92 1 22.92 2  
22.94 1 22.94 2  
22.96 1 22.96 2  
22.98 1 22.98 2  
23 1 23 2  
23.02 1 23.02 2  
23.04 1 23.04 2

23.06 1 23.06 2  
23.08 1 23.08 2  
23.1 1 23.1 3  
23.12 1 23.12 3  
23.14 1 23.14 3  
23.16 1 23.16 3  
23.18 2 23.18 3  
23.2 2 23.2 3  
23.22 2 23.22 3  
23.24 2 23.24 3  
23.26 2 23.26 3  
23.28 2 23.28 3  
23.3 2 23.3 3  
23.32 2 23.32 3  
23.34 2 23.34 3  
23.36 2 23.36 3  
23.38 1 23.38 3  
23.4 1 23.4 3  
23.42 1 23.42 3  
23.44 1 23.44 3  
23.46 1 23.46 3  
23.48 1 23.48 3



23.5 1 23.5 4  
23.52 1 23.52 4  
23.54 2 23.54 4  
23.56 2 23.56 4  
23.58 2 23.58 4  
23.6 2 23.6 3  
23.62 2 23.62 3  
23.64 2 23.64 3  
23.66 2 23.66 3  
23.68 2 23.68 3  
23.7 2 23.7 3  
23.72 2 23.72 3  
23.74 2 23.74 3  
23.76 2 23.76 2  
23.78 2 23.78 3  
23.8 2 23.8 3  
23.82 2 23.82 3  
23.84 2 23.84 3  
23.86 2 23.86 3  
23.88 2 23.88 3  
23.9 2 23.9 3  
23.92 2 23.92 3

23.94 2 23.94 3

23.96 2 23.96 3

23.98 3 23.98 3

24 3 24 4

24.02 3 24.02 4

24.04 3 24.04 4

24.06 4 24.06 5

24.08 4 24.08 5

24.1 4 24.1 5

24.12 4 24.12 5

24.14 4 24.14 5

24.16 4 24.16 5

24.18 5 24.18 5

24.2 4 24.2 5

24.22 4 24.22 5

24.24 5 24.24 5

24.26 5 24.26 5

24.28 5 24.28 5

24.3 5 24.3 5

24.32 6 24.32 6

24.34 6 24.34 6

24.36 6 24.36 6

24.38 6 24.38 7  
24.4 6 24.4 7  
24.42 7 24.42 7  
24.44 7 24.44 7  
24.46 7 24.46 8  
24.48 6 24.48 8  
24.5 5 24.5 8  
24.52 5 24.52 8  
24.54 5 24.54 8  
24.56 5 24.56 8  
24.58 6 24.58 7  
24.6 6 24.6 7  
24.62 7 24.62 8  
24.64 7 24.64 8  
24.66 8 24.66 8  
24.68 9 24.68 8  
24.7 10 24.7 8  
24.72 10 24.72 8  
24.74 9 24.74 8  
24.76 9 24.76 9  
24.78 9 24.78 9  
24.8 9 24.8 10

24.82 8 24.82 10  
24.84 9 24.84 10  
24.86 9 24.86 10  
24.88 9 24.88 11  
24.9 10 24.9 11  
24.92 12 24.92 12  
24.94 13 24.94 12  
24.96 14 24.96 13  
24.98 15 24.98 14  
25 16 25 15  
25.02 18 25.02 16  
25.04 19 25.04 16  
25.06 20 25.06 17  
25.08 21 25.08 18  
25.1 23 25.1 18  
25.12 23 25.12 20  
25.14 24 25.14 20  
25.16 26 25.16 22  
25.18 26 25.18 23  
25.2 30 25.2 26  
25.22 32 25.22 28  
25.24 35 25.24 33

25.26 38 25.26 35  
25.28 44 25.28 39  
25.3 50 25.3 41  
25.32 55 25.32 43  
25.34 58 25.34 49  
25.36 63 25.36 52  
25.38 64 25.38 56  
25.4 66 25.4 62  
25.42 69 25.42 66  
25.44 69 25.44 72  
25.46 68 25.46 78  
25.48 70 25.48 82  
25.5 70 25.5 86  
25.52 71 25.52 89  
25.54 74 25.54 88  
25.56 77 25.56 87  
25.58 76 25.58 86  
25.6 73 25.6 84  
25.62 69 25.62 82  
25.64 67 25.64 78  
25.66 63 25.66 75  
25.68 61 25.68 72

25.7 57 25.7 69

25.72 51 25.72 65

25.74 47 25.74 61

25.76 44 25.76 56

25.78 40 25.78 53

25.8 37 25.8 47

25.82 35 25.82 42

25.84 32 25.84 38

25.86 27 25.86 37

25.88 23 25.88 34

25.9 20 25.9 30

25.92 19 25.92 28

25.94 17 25.94 25

25.96 16 25.96 23

25.98 14 25.98 21

26 12 26 18

26.02 12 26.02 15

26.04 11 26.04 14

26.06 11 26.06 11

26.08 11 26.08 10

26.1 11 26.1 9

26.12 11 26.12 10

26.14 10 26.14 11  
26.16 10 26.16 11  
26.18 9 26.18 10  
26.2 8 26.2 10  
26.22 7 26.22 10  
26.24 6 26.24 10  
26.26 6 26.26 10  
26.28 6 26.28 9  
26.3 5 26.3 8  
26.32 6 26.32 7  
26.34 5 26.34 5  
26.36 5 26.36 5  
26.38 5 26.38 5  
26.4 5 26.4 6  
26.42 5 26.42 6  
26.44 5 26.44 6  
26.46 4 26.46 5  
26.48 4 26.48 6  
26.5 4 26.5 7  
26.52 3 26.52 7  
26.54 4 26.54 7  
26.56 4 26.56 7

26.58 4 26.58 6

26.6 3 26.6 6

26.62 3 26.62 5

26.64 3 26.64 5

26.66 3 26.66 5

26.68 3 26.68 5

26.7 3 26.7 5

26.72 3 26.72 6

26.74 3 26.74 5

26.76 4 26.76 6

26.78 3 26.78 6

26.8 3 26.8 6

26.82 4 26.82 5

26.84 4 26.84 5

26.86 4 26.86 5

26.88 3 26.88 5

26.9 3 26.9 4

26.92 3 26.92 5

26.94 3 26.94 5

26.96 3 26.96 4

26.98 3 26.98 4

27 3 27 5



27.02 3 27.02 5  
27.04 3 27.04 5  
27.06 4 27.06 5  
27.08 4 27.08 5  
27.1 5 27.1 4  
27.12 5 27.12 5  
27.14 5 27.14 5  
27.16 5 27.16 5  
27.18 6 27.18 6  
27.2 6 27.2 6  
27.22 6 27.22 6  
27.24 6 27.24 6  
27.26 6 27.26 6  
27.28 5 27.28 5  
27.3 6 27.3 5  
27.32 7 27.32 6  
27.34 7 27.34 7  
27.36 8 27.36 7  
27.38 8 27.38 8  
27.4 8 27.4 9  
27.42 9 27.42 10  
27.44 9 27.44 11

27.46 10 27.46 12  
27.48 10 27.48 13  
27.5 10 27.5 12  
27.52 10 27.52 11  
27.54 9 27.54 10  
27.56 10 27.56 10  
27.58 11 27.58 9  
27.6 11 27.6 9  
27.62 11 27.62 10  
27.64 11 27.64 9  
27.66 11 27.66 10  
27.68 12 27.68 11  
27.7 12 27.7 11  
27.72 12 27.72 12  
27.74 13 27.74 13  
27.76 13 27.76 14  
27.78 13 27.78 14  
27.8 12 27.8 14  
27.82 11 27.82 13  
27.84 11 27.84 13  
27.86 11 27.86 13  
27.88 9 27.88 12

27.9 9 27.9 12  
27.92 8 27.92 11  
27.94 7 27.94 11  
27.96 7 27.96 10  
27.98 6 27.98 9  
28 6 28 9  
28.02 6 28.02 8  
28.04 5 28.04 8  
28.06 4 28.06 8  
28.08 4 28.08 6  
28.1 3 28.1 6  
28.12 3 28.12 5  
28.14 3 28.14 5  
28.16 3 28.16 5  
28.18 2 28.18 5  
28.2 2 28.2 5  
28.22 3 28.22 5  
28.24 2 28.24 5  
28.26 3 28.26 5  
28.28 3 28.28 5  
28.3 3 28.3 5  
28.32 3 28.32 4

28.34 2 28.34 4  
28.36 2 28.36 4  
28.38 2 28.38 3  
28.4 2 28.4 3  
28.42 2 28.42 3  
28.44 2 28.44 3  
28.46 1 28.46 3  
28.48 2 28.48 3  
28.5 2 28.5 2  
28.52 2 28.52 2  
28.54 2 28.54 2  
28.56 1 28.56 2  
28.58 1 28.58 2  
28.6 1 28.6 2  
28.62 1 28.62 2  
28.64 1 28.64 2  
28.66 1 28.66 2  
28.68 1 28.68 2  
28.7 0 28.7 2  
28.72 0 28.72 2  
28.74 1 28.74 2  
28.76 1 28.76 2

28.78 1 28.78 2  
28.8 1 28.8 3  
28.82 1 28.82 3  
28.84 1 28.84 3  
28.86 1 28.86 3  
28.88 1 28.88 2  
28.9 2 28.9 2  
28.92 2 28.92 2  
28.94 1 28.94 2  
28.96 1 28.96 2  
28.98 1 28.98 1  
29 1 29 1  
29.02 1 29.02 2  
29.04 1 29.04 2  
29.06 1 29.06 2  
29.08 1 29.08 2  
29.1 0 29.1 2  
29.12 1 29.12 2  
29.14 1 29.14 2  
29.16 1 29.16 2  
29.18 1 29.18 2  
29.2 1 29.2 2

29.22 1 29.22 2  
29.24 1 29.24 3  
29.26 2 29.26 3  
29.28 2 29.28 3  
29.3 2 29.3 3  
29.32 1 29.32 3  
29.34 1 29.34 3  
29.36 1 29.36 2  
29.38 1 29.38 2  
29.4 1 29.4 2  
29.42 1 29.42 2  
29.44 1 29.44 2  
29.46 1 29.46 2  
29.48 1 29.48 1  
29.5 2 29.5 2  
29.52 2 29.52 2  
29.54 2 29.54 2  
29.56 2 29.56 1  
29.58 1 29.58 2  
29.6 1 29.6 2  
29.62 1 29.62 2  
29.64 0 29.64 3

29.66 0 29.66 3

29.68 1 29.68 3

29.7 1 29.7 3

29.72 0 29.72 3

29.74 1 29.74 2

29.76 1 29.76 2

29.78 1 29.78 1

29.8 1 29.8 1

29.82 1 29.82 1

29.84 1 29.84 1

29.86 1 29.86 1

29.88 1 29.88 2

29.9 1 29.9 2

29.92 1 29.92 2

29.94 1 29.94 3

29.96 1 29.96 3

29.98 1 29.98 2

30 1 30 2

30.02 1 30.02 2

30.04 0 30.04 2

30.06 0 30.06 2

30.08 0 30.08 2

30.1 0 30.1 2  
30.12 1 30.12 2  
30.14 1 30.14 1  
30.16 1 30.16 1  
30.18 1 30.18 1  
30.2 2 30.2 1  
30.22 2 30.22 1  
30.24 2 30.24 1  
30.26 2 30.26 1  
30.28 2 30.28 1  
30.3 2 30.3 1  
30.32 1 30.32 2  
30.34 1 30.34 2  
30.36 1 30.36 2  
30.38 1 30.38 2  
30.4 1 30.4 1  
30.42 0 30.42 1  
30.44 0 30.44 1  
30.46 1 30.46 1  
30.48 1 30.48 2  
30.5 1 30.5 1  
30.52 1 30.52 2



30.54 1 30.54 2  
30.56 1 30.56 1  
30.58 1 30.58 2  
30.6 1 30.6 1  
30.62 1 30.62 1  
30.64 1 30.64 2  
30.66 1 30.66 2  
30.68 1 30.68 2  
30.7 1 30.7 2  
30.72 1 30.72 2  
30.74 1 30.74 2  
30.76 0 30.76 2  
30.78 0 30.78 2  
30.8 0 30.8 1  
30.82 0 30.82 1  
30.84 0 30.84 1  
30.86 0 30.86 1  
30.88 0 30.88 1  
30.9 0 30.9 1  
30.92 0 30.92 1  
30.94 0 30.94 1  
30.96 1 30.96 2

30.98 1 30.98 2  
31 1 31 2  
31.02 1 31.02 2  
31.04 1 31.04 2  
31.06 1 31.06 2  
31.08 0 31.08 1  
31.1 1 31.1 1  
31.12 1 31.12 2  
31.14 1 31.14 1  
31.16 0 31.16 1  
31.18 0 31.18 1  
31.2 0 31.2 1  
31.22 0 31.22 1  
31.24 0 31.24 1  
31.26 0 31.26 1  
31.28 1 31.28 1  
31.3 0 31.3 1  
31.32 1 31.32 1  
31.34 1 31.34 1  
31.36 1 31.36 1  
31.38 1 31.38 1  
31.4 1 31.4 1

31.42 1 31.42 1  
31.44 1 31.44 1  
31.46 1 31.46 1  
31.48 1 31.48 0  
31.5 1 31.5 1  
31.52 1 31.52 1  
31.54 1 31.54 1  
31.56 1 31.56 2  
31.58 1 31.58 2  
31.6 1 31.6 2  
31.62 1 31.62 2  
31.64 1 31.64 2  
31.66 1 31.66 1  
31.68 1 31.68 1  
31.7 1 31.7 1  
31.72 1 31.72 1  
31.74 1 31.74 1  
31.76 1 31.76 1  
31.78 1 31.78 1  
31.8 1 31.8 1  
31.82 1 31.82 1  
31.84 1 31.84 1

31.86 1 31.86 1  
31.88 1 31.88 1  
31.9 1 31.9 1  
31.92 1 31.92 1  
31.94 1 31.94 1  
31.96 1 31.96 1  
31.98 1 31.98 1  
32 1 32 1  
32.02 0 32.02 1  
32.04 1 32.04 1  
32.06 1 32.06 1  
32.08 1 32.08 1  
32.1 1 32.1 1  
32.12 1 32.12 2  
32.14 1 32.14 1  
32.16 0 32.16 1  
32.18 1 32.18 1  
32.2 1 32.2 1  
32.22 1 32.22 1  
32.24 1 32.24 1  
32.26 1 32.26 1  
32.28 1 32.28 0

32.3 1 32.3 0  
32.32 1 32.32 1  
32.34 1 32.34 1  
32.36 1 32.36 1  
32.38 1 32.38 1  
32.4 1 32.4 1  
32.42 1 32.42 1  
32.44 1 32.44 1  
32.46 1 32.46 1  
32.48 0 32.48 1  
32.5 1 32.5 1  
32.52 1 32.52 1  
32.54 1 32.54 1  
32.56 1 32.56 1  
32.58 1 32.58 1  
32.6 1 32.6 1  
32.62 1 32.62 1  
32.64 2 32.64 1  
32.66 1 32.66 1  
32.68 1 32.68 1  
32.7 1 32.7 1  
32.72 1 32.72 1

32.74 1 32.74 1  
32.76 1 32.76 1  
32.78 1 32.78 1  
32.8 1 32.8 1  
32.82 2 32.82 1  
32.84 2 32.84 1  
32.86 2 32.86 1  
32.88 2 32.88 1  
32.9 1 32.9 1  
32.92 1 32.92 1  
32.94 1 32.94 1  
32.96 1 32.96 1  
32.98 1 32.98 1  
33 1 33 1  
33.02 1 33.02 0  
33.04 0 33.04 0  
33.06 0 33.06 1  
33.08 0 33.08 1  
33.1 1 33.1 1  
33.12 1 33.12 1  
33.14 1 33.14 1  
33.16 1 33.16 1

33.18 1 33.18 1  
33.2 1 33.2 1  
33.22 1 33.22 1  
33.24 1 33.24 1  
33.26 1 33.26 2  
33.28 1 33.28 2  
33.3 1 33.3 2  
33.32 1 33.32 2  
33.34 1 33.34 2  
33.36 1 33.36 2  
33.38 1 33.38 2  
33.4 1 33.4 1  
33.42 1 33.42 1  
33.44 1 33.44 1  
33.46 0 33.46 1  
33.48 0 33.48 1  
33.5 0 33.5 0  
33.52 0 33.52 1  
33.54 0 33.54 1  
33.56 0 33.56 1  
33.58 0 33.58 1  
33.6 0 33.6 1

33.62 0 33.62 2  
33.64 0 33.64 1  
33.66 1 33.66 2  
33.68 1 33.68 2  
33.7 1 33.7 2  
33.72 1 33.72 2  
33.74 1 33.74 2  
33.76 1 33.76 2  
33.78 1 33.78 2  
33.8 1 33.8 2  
33.82 1 33.82 2  
33.84 1 33.84 2  
33.86 1 33.86 2  
33.88 1 33.88 2  
33.9 1 33.9 2  
33.92 1 33.92 1  
33.94 1 33.94 2  
33.96 2 33.96 1  
33.98 2 33.98 1  
34 2 34 1  
34.02 2 34.02 1  
34.04 2 34.04 1



34.06 2 34.06 1  
34.08 2 34.08 1  
34.1 1 34.1 1  
34.12 1 34.12 1  
34.14 1 34.14 2  
34.16 0 34.16 2  
34.18 0 34.18 2  
34.2 0 34.2 2  
34.22 0 34.22 2  
34.24 1 34.24 2  
34.26 1 34.26 2  
34.28 1 34.28 2  
34.3 1 34.3 2  
34.32 1 34.32 2  
34.34 1 34.34 2  
34.36 1 34.36 2  
34.38 1 34.38 2  
34.4 2 34.4 2  
34.42 2 34.42 2  
34.44 2 34.44 2  
34.46 2 34.46 1  
34.48 2 34.48 1

34.5 2 34.5 1  
34.52 2 34.52 1  
34.54 2 34.54 1  
34.56 2 34.56 1  
34.58 2 34.58 1  
34.6 1 34.6 1  
34.62 1 34.62 1  
34.64 1 34.64 1  
34.66 1 34.66 1  
34.68 0 34.68 1  
34.7 1 34.7 1  
34.72 1 34.72 1  
34.74 1 34.74 1  
34.76 1 34.76 2  
34.78 1 34.78 2  
34.8 1 34.8 2  
34.82 1 34.82 2  
34.84 1 34.84 1  
34.86 1 34.86 2  
34.88 1 34.88 2  
34.9 1 34.9 2  
34.92 1 34.92 2

34.94 1 34.94 2  
34.96 1 34.96 2  
34.98 1 34.98 2  
35 1 35 2  
35.02 1 35.02 2  
35.04 1 35.04 2  
35.06 1 35.06 2  
35.08 1 35.08 2  
35.1 1 35.1 2  
35.12 1 35.12 2  
35.14 1 35.14 3  
35.16 0 35.16 3  
35.18 0 35.18 3  
35.2 1 35.2 3  
35.22 1 35.22 2  
35.24 1 35.24 2  
35.26 1 35.26 2  
35.28 1 35.28 2  
35.3 2 35.3 2  
35.32 2 35.32 2  
35.34 1 35.34 2  
35.36 2 35.36 2

35.38 2 35.38 2  
35.4 2 35.4 2  
35.42 2 35.42 2  
35.44 2 35.44 2  
35.46 2 35.46 2  
35.48 3 35.48 2  
35.5 3 35.5 2  
35.52 3 35.52 2  
35.54 2 35.54 2  
35.56 2 35.56 2  
35.58 2 35.58 2  
35.6 1 35.6 2  
35.62 1 35.62 2  
35.64 1 35.64 3  
35.66 1 35.66 3  
35.68 1 35.68 3  
35.7 2 35.7 3  
35.72 2 35.72 3  
35.74 2 35.74 3  
35.76 2 35.76 3  
35.78 2 35.78 3  
35.8 2 35.8 3

35.82 2 35.82 3

35.84 2 35.84 3

35.86 3 35.86 3

35.88 3 35.88 2

35.9 3 35.9 3

35.92 3 35.92 3

35.94 3 35.94 3

35.96 3 35.96 3

35.98 3 35.98 3

36 3 36 4

36.02 3 36.02 5

36.04 3 36.04 5

36.06 4 36.06 5

36.08 4 36.08 6

36.1 4 36.1 6

36.12 5 36.12 7

36.14 5 36.14 7

36.16 5 36.16 7

36.18 5 36.18 7

36.2 5 36.2 7

36.22 5 36.22 7

36.24 5 36.24 7

36.26 5 36.26 8  
36.28 5 36.28 8  
36.3 6 36.3 8  
36.32 6 36.32 8  
36.34 7 36.34 8  
36.36 7 36.36 8  
36.38 7 36.38 8  
36.4 7 36.4 8  
36.42 6 36.42 8  
36.44 6 36.44 7  
36.46 6 36.46 6  
36.48 5 36.48 6  
36.5 5 36.5 6  
36.52 5 36.52 6  
36.54 5 36.54 6  
36.56 6 36.56 6  
36.58 6 36.58 7  
36.6 6 36.6 8  
36.62 6 36.62 8  
36.64 6 36.64 7  
36.66 5 36.66 7  
36.68 4 36.68 6

36.7 4 36.7 6  
36.72 3 36.72 5  
36.74 3 36.74 4  
36.76 3 36.76 4  
36.78 3 36.78 4  
36.8 3 36.8 4  
36.82 4 36.82 4  
36.84 4 36.84 4  
36.86 4 36.86 4  
36.88 4 36.88 5  
36.9 4 36.9 5  
36.92 4 36.92 5  
36.94 4 36.94 6  
36.96 4 36.96 5  
36.98 5 36.98 5  
37 5 37 5  
37.02 6 37.02 5  
37.04 6 37.04 5  
37.06 6 37.06 5  
37.08 6 37.08 5  
37.1 6 37.1 5  
37.12 6 37.12 6

37.14 5 37.14 6  
37.16 5 37.16 8  
37.18 5 37.18 8  
37.2 5 37.2 8  
37.22 5 37.22 8  
37.24 6 37.24 8  
37.26 7 37.26 8  
37.28 7 37.28 8  
37.3 7 37.3 7  
37.32 7 37.32 6  
37.34 7 37.34 6  
37.36 7 37.36 6  
37.38 8 37.38 6  
37.4 8 37.4 5  
37.42 8 37.42 5  
37.44 7 37.44 6  
37.46 8 37.46 6  
37.48 7 37.48 6  
37.5 7 37.5 6  
37.52 7 37.52 6  
37.54 6 37.54 6  
37.56 6 37.56 6



37.58 6 37.58 5  
37.6 7 37.6 5  
37.62 7 37.62 5  
37.64 7 37.64 5  
37.66 7 37.66 5  
37.68 7 37.68 6  
37.7 8 37.7 7  
37.72 8 37.72 8  
37.74 9 37.74 8  
37.76 8 37.76 9  
37.78 9 37.78 10  
37.8 10 37.8 10  
37.82 11 37.82 11  
37.84 11 37.84 11  
37.86 12 37.86 10  
37.88 12 37.88 11  
37.9 13 37.9 11  
37.92 13 37.92 13  
37.94 13 37.94 13  
37.96 14 37.96 14  
37.98 15 37.98 15  
38 14 38 15

38.02 14 38.02 15  
38.04 15 38.04 15  
38.06 15 38.06 15  
38.08 16 38.08 16  
38.1 15 38.1 15  
38.12 15 38.12 16  
38.14 16 38.14 15  
38.16 15 38.16 15  
38.18 15 38.18 14  
38.2 14 38.2 14  
38.22 14 38.22 13  
38.24 15 38.24 13  
38.26 14 38.26 12  
38.28 12 38.28 11  
38.3 11 38.3 10  
38.32 11 38.32 10  
38.34 9 38.34 10  
38.36 9 38.36 10  
38.38 8 38.38 10  
38.4 7 38.4 10  
38.42 7 38.42 10  
38.44 6 38.44 9

38.46 6 38.46 9  
38.48 6 38.48 10  
38.5 7 38.5 9  
38.52 6 38.52 9  
38.54 6 38.54 9  
38.56 6 38.56 8  
38.58 5 38.58 8  
38.6 6 38.6 8  
38.62 7 38.62 7  
38.64 7 38.64 7  
38.66 7 38.66 7  
38.68 8 38.68 7  
38.7 7 38.7 7  
38.72 8 38.72 7  
38.74 7 38.74 7  
38.76 7 38.76 8  
38.78 7 38.78 8  
38.8 6 38.8 8  
38.82 5 38.82 8  
38.84 5 38.84 8  
38.86 5 38.86 9  
38.88 6 38.88 9

38.9 6 38.9 8

38.92 6 38.92 8

38.94 6 38.94 8

38.96 6 38.96 7

38.98 6 38.98 6

39 5 39 5

39.02 4 39.02 4

39.04 4 39.04 5

39.06 3 39.06 4

39.08 3 39.08 4

39.1 2 39.1 4

39.12 2 39.12 4

39.14 3 39.14 4

39.16 3 39.16 5

39.18 4 39.18 4

39.2 4 39.2 4

39.22 4 39.22 4

39.24 4 39.24 4

39.26 4 39.26 4

39.28 4 39.28 4

39.3 3 39.3 3

39.32 3 39.32 4

39.34 3 39.34 4  
39.36 3 39.36 4  
39.38 2 39.38 4  
39.4 2 39.4 4  
39.42 1 39.42 3  
39.44 1 39.44 3  
39.46 1 39.46 3  
39.48 2 39.48 3  
39.5 1 39.5 3  
39.52 1 39.52 3  
39.54 2 39.54 3  
39.56 1 39.56 3  
39.58 2 39.58 2  
39.6 2 39.6 2  
39.62 2 39.62 2  
39.64 2 39.64 2  
39.66 2 39.66 2  
39.68 2 39.68 2  
39.7 2 39.7 2  
39.72 2 39.72 2  
39.74 2 39.74 2  
39.76 2 39.76 2

39.78 1 39.78 2  
39.8 1 39.8 1  
39.82 1 39.82 1  
39.84 1 39.84 1  
39.86 1 39.86 1  
39.88 1 39.88 1  
39.9 1 39.9 1  
39.92 1 39.92 1  
39.94 1 39.94 2  
39.96 1 39.96 2  
39.98 1 39.98 3  
40 1 40 3  
40.02 1 40.02 3  
40.04 1 40.04 3  
40.06 1 40.06 3  
40.08 1 40.08 3  
40.1 1 40.1 3  
40.12 1 40.12 2  
40.14 1 40.14 2  
40.16 1 40.16 2  
40.18 1 40.18 2  
40.2 0 40.2 2

40.22 0 40.22 2  
40.24 0 40.24 1  
40.26 1 40.26 2  
40.28 0 40.28 2  
40.3 1 40.3 2  
40.32 1 40.32 2  
40.34 1 40.34 2  
40.36 2 40.36 2  
40.38 2 40.38 2  
40.4 2 40.4 2  
40.42 2 40.42 2  
40.44 2 40.44 1  
40.46 2 40.46 1  
40.48 2 40.48 1  
40.5 1 40.5 1  
40.52 1 40.52 2  
40.54 1 40.54 2  
40.56 1 40.56 2  
40.58 1 40.58 2  
40.6 1 40.6 2  
40.62 1 40.62 2  
40.64 1 40.64 2

40.66 1 40.66 2  
40.68 1 40.68 2  
40.7 1 40.7 2  
40.72 1 40.72 2  
40.74 1 40.74 2  
40.76 1 40.76 2  
40.78 1 40.78 2  
40.8 1 40.8 2  
40.82 1 40.82 2  
40.84 1 40.84 2  
40.86 1 40.86 1  
40.88 1 40.88 1  
40.9 2 40.9 1  
40.92 1 40.92 1  
40.94 1 40.94 1  
40.96 1 40.96 1  
40.98 1 40.98 2  
41 2 41 2  
41.02 2 41.02 2  
41.04 2 41.04 2  
41.06 3 41.06 2  
41.08 2 41.08 2



41.1 2 41.1 2  
41.12 3 41.12 2  
41.14 3 41.14 2  
41.16 3 41.16 1  
41.18 3 41.18 1  
41.2 3 41.2 2  
41.22 3 41.22 1  
41.24 3 41.24 1  
41.26 3 41.26 2  
41.28 3 41.28 2  
41.3 3 41.3 2  
41.32 3 41.32 2  
41.34 3 41.34 3  
41.36 2 41.36 3  
41.38 3 41.38 4  
41.4 3 41.4 4  
41.42 3 41.42 4  
41.44 4 41.44 5  
41.46 4 41.46 5  
41.48 4 41.48 5  
41.5 4 41.5 5  
41.52 4 41.52 5

41.54 4 41.54 5  
41.56 4 41.56 4  
41.58 3 41.58 4  
41.6 3 41.6 3  
41.62 3 41.62 3  
41.64 3 41.64 3  
41.66 3 41.66 3  
41.68 3 41.68 2  
41.7 3 41.7 3  
41.72 3 41.72 3  
41.74 3 41.74 3  
41.76 2 41.76 3  
41.78 2 41.78 3  
41.8 2 41.8 3  
41.82 1 41.82 3  
41.84 2 41.84 2  
41.86 2 41.86 2  
41.88 1 41.88 2  
41.9 1 41.9 3  
41.92 1 41.92 2  
41.94 2 41.94 2  
41.96 1 41.96 2

41.98 1 41.98 2  
42 1 42 2  
42.02 1 42.02 2  
42.04 1 42.04 2  
42.06 1 42.06 2  
42.08 1 42.08 2  
42.1 1 42.1 1  
42.12 1 42.12 1  
42.14 1 42.14 2  
42.16 1 42.16 2  
42.18 1 42.18 2  
42.2 1 42.2 2  
42.22 1 42.22 2  
42.24 1 42.24 1  
42.26 1 42.26 1  
42.28 1 42.28 1  
42.3 0 42.3 2  
42.32 1 42.32 1  
42.34 0 42.34 1  
42.36 0 42.36 1  
42.38 1 42.38 1  
42.4 1 42.4 2

42.42 1 42.42 1  
42.44 1 42.44 2  
42.46 1 42.46 2  
42.48 1 42.48 2  
42.5 1 42.5 2  
42.52 1 42.52 2  
42.54 1 42.54 1  
42.56 1 42.56 1  
42.58 1 42.58 1  
42.6 1 42.6 1  
42.62 1 42.62 1  
42.64 1 42.64 1  
42.66 0 42.66 1  
42.68 1 42.68 1  
42.7 0 42.7 1  
42.72 0 42.72 1  
42.74 0 42.74 1  
42.76 1 42.76 1  
42.78 1 42.78 1  
42.8 1 42.8 1  
42.82 1 42.82 1  
42.84 1 42.84 1

42.86 2 42.86 1  
42.88 2 42.88 1  
42.9 2 42.9 1  
42.92 1 42.92 1  
42.94 1 42.94 1  
42.96 1 42.96 1  
42.98 0 42.98 1  
43 0 43 1  
43.02 0 43.02 1  
43.04 0 43.04 2  
43.06 1 43.06 2  
43.08 1 43.08 2  
43.1 1 43.1 2  
43.12 1 43.12 2  
43.14 1 43.14 2  
43.16 1 43.16 2  
43.18 1 43.18 1  
43.2 1 43.2 1  
43.22 1 43.22 1  
43.24 1 43.24 1  
43.26 1 43.26 1  
43.28 1 43.28 2

43.3 1 43.3 2  
43.32 1 43.32 2  
43.34 1 43.34 2  
43.36 1 43.36 2  
43.38 1 43.38 2  
43.4 1 43.4 2  
43.42 1 43.42 2  
43.44 1 43.44 2  
43.46 1 43.46 2  
43.48 1 43.48 2  
43.5 1 43.5 2  
43.52 0 43.52 2  
43.54 0 43.54 2  
43.56 1 43.56 2  
43.58 1 43.58 2  
43.6 1 43.6 2  
43.62 1 43.62 2  
43.64 1 43.64 2  
43.66 1 43.66 1  
43.68 0 43.68 1  
43.7 1 43.7 1  
43.72 1 43.72 1

43.74 1 43.74 1  
43.76 1 43.76 1  
43.78 1 43.78 2  
43.8 1 43.8 2  
43.82 1 43.82 2  
43.84 1 43.84 2  
43.86 1 43.86 2  
43.88 1 43.88 2  
43.9 1 43.9 2  
43.92 1 43.92 2  
43.94 1 43.94 2  
43.96 1 43.96 2  
43.98 2 43.98 1  
44 2 44 1  
44.02 2 44.02 2  
44.04 2 44.04 2  
44.06 2 44.06 2  
44.08 2 44.08 2  
44.1 2 44.1 1  
44.12 2 44.12 1  
44.14 2 44.14 2  
44.16 2 44.16 2

44.18 2 44.18 2  
44.2 1 44.2 2  
44.22 1 44.22 2  
44.24 1 44.24 2  
44.26 1 44.26 2  
44.28 1 44.28 2  
44.3 1 44.3 1  
44.32 1 44.32 1  
44.34 1 44.34 1  
44.36 1 44.36 1  
44.38 1 44.38 1  
44.4 1 44.4 1  
44.42 1 44.42 1  
44.44 1 44.44 1  
44.46 1 44.46 1  
44.48 1 44.48 1  
44.5 1 44.5 2  
44.52 1 44.52 2  
44.54 1 44.54 2  
44.56 1 44.56 1  
44.58 1 44.58 1  
44.6 1 44.6 1



44.62 1 44.62 1  
44.64 1 44.64 1  
44.66 1 44.66 1  
44.68 1 44.68 1  
44.7 1 44.7 1  
44.72 1 44.72 1  
44.74 0 44.74 1  
44.76 0 44.76 1  
44.78 0 44.78 2  
44.8 0 44.8 2  
44.82 0 44.82 2  
44.84 0 44.84 2  
44.86 0 44.86 2  
44.88 0 44.88 2  
44.9 0 44.9 2  
44.92 1 44.92 2  
44.94 1 44.94 1  
44.96 1 44.96 1  
44.98 2 44.98 1  
45 2 45 1  
45.02 2 45.02 1  
45.04 2 45.04 1

45.06 2 45.06 1  
45.08 2 45.08 1  
45.1 1 45.1 1  
45.12 1 45.12 1  
45.14 1 45.14 1  
45.16 1 45.16 1  
45.18 1 45.18 1  
45.2 1 45.2 1  
45.22 1 45.22 1  
45.24 2 45.24 1  
45.26 2 45.26 1  
45.28 2 45.28 1  
45.3 2 45.3 1  
45.32 2 45.32 1  
45.34 2 45.34 1  
45.36 2 45.36 1  
45.38 1 45.38 1  
45.4 1 45.4 1  
45.42 1 45.42 1  
45.44 0 45.44 1  
45.46 0 45.46 1  
45.48 0 45.48 2

45.5 0 45.5 2  
45.52 0 45.52 2  
45.54 0 45.54 2  
45.56 0 45.56 2  
45.58 1 45.58 2  
45.6 1 45.6 2  
45.62 1 45.62 2  
45.64 1 45.64 2  
45.66 1 45.66 2  
45.68 1 45.68 2  
45.7 1 45.7 2  
45.72 1 45.72 2  
45.74 1 45.74 2  
45.76 1 45.76 2  
45.78 1 45.78 2  
45.8 1 45.8 1  
45.82 1 45.82 1  
45.84 1 45.84 1  
45.86 1 45.86 1  
45.88 1 45.88 1  
45.9 1 45.9 2  
45.92 1 45.92 2

45.94 1 45.94 2  
45.96 1 45.96 3  
45.98 1 45.98 3  
46 1 46 3  
46.02 1 46.02 3  
46.04 1 46.04 2  
46.06 1 46.06 2  
46.08 2 46.08 2  
46.1 2 46.1 2  
46.12 2 46.12 2  
46.14 2 46.14 2  
46.16 1 46.16 2  
46.18 1 46.18 2  
46.2 1 46.2 2  
46.22 1 46.22 2  
46.24 1 46.24 2  
46.26 1 46.26 2  
46.28 1 46.28 2  
46.3 1 46.3 2  
46.32 1 46.32 2  
46.34 2 46.34 2  
46.36 2 46.36 1

46.38 2 46.38 1  
46.4 2 46.4 2  
46.42 2 46.42 2  
46.44 2 46.44 1  
46.46 1 46.46 2  
46.48 1 46.48 2  
46.5 1 46.5 2  
46.52 1 46.52 3  
46.54 1 46.54 3  
46.56 0 46.56 3  
46.58 1 46.58 3  
46.6 1 46.6 3  
46.62 1 46.62 3  
46.64 1 46.64 3  
46.66 1 46.66 3  
46.68 2 46.68 2  
46.7 2 46.7 2  
46.72 2 46.72 2  
46.74 2 46.74 2  
46.76 2 46.76 1  
46.78 2 46.78 2  
46.8 2 46.8 2

46.82 2 46.82 2  
46.84 1 46.84 2  
46.86 1 46.86 3  
46.88 1 46.88 3  
46.9 1 46.9 3  
46.92 1 46.92 3  
46.94 1 46.94 3  
46.96 1 46.96 3  
46.98 1 46.98 3  
47 2 47 3  
47.02 2 47.02 3  
47.04 2 47.04 3  
47.06 2 47.06 4  
47.08 2 47.08 4  
47.1 2 47.1 3  
47.12 2 47.12 3  
47.14 2 47.14 3  
47.16 2 47.16 3  
47.18 2 47.18 2  
47.2 2 47.2 3  
47.22 2 47.22 3  
47.24 3 47.24 3

47.26 3 47.26 3  
47.28 3 47.28 3  
47.3 2 47.3 3  
47.32 2 47.32 3  
47.34 2 47.34 3  
47.36 2 47.36 3  
47.38 2 47.38 2  
47.4 2 47.4 3  
47.42 2 47.42 3  
47.44 2 47.44 3  
47.46 1 47.46 3  
47.48 1 47.48 3  
47.5 2 47.5 3  
47.52 2 47.52 4  
47.54 3 47.54 4  
47.56 3 47.56 4  
47.58 4 47.58 4  
47.6 5 47.6 4  
47.62 5 47.62 4  
47.64 5 47.64 4  
47.66 5 47.66 5  
47.68 4 47.68 4

47.7 5 47.7 5

47.72 5 47.72 5

47.74 5 47.74 5

47.76 6 47.76 5

47.78 6 47.78 5

47.8 6 47.8 6

47.82 7 47.82 6

47.84 7 47.84 6

47.86 8 47.86 7

47.88 8 47.88 8

47.9 8 47.9 8

47.92 8 47.92 8

47.94 8 47.94 9

47.96 10 47.96 8

47.98 11 47.98 9

48 12 48 9

48.02 13 48.02 10

48.04 15 48.04 11

48.06 16 48.06 12

48.08 16 48.08 13

48.1 18 48.1 15

48.12 19 48.12 18



48.14 19 48.14 20  
48.16 20 48.16 22  
48.18 21 48.18 23  
48.2 21 48.2 25  
48.22 21 48.22 25  
48.24 22 48.24 26  
48.26 21 48.26 26  
48.28 21 48.28 25  
48.3 21 48.3 24  
48.32 21 48.32 23  
48.34 20 48.34 23  
48.36 19 48.36 22  
48.38 20 48.38 22  
48.4 19 48.4 22  
48.42 19 48.42 21  
48.44 18 48.44 20  
48.46 18 48.46 20  
48.48 17 48.48 19  
48.5 16 48.5 18  
48.52 14 48.52 17  
48.54 13 48.54 16  
48.56 12 48.56 15

48.58 10 48.58 14  
48.6 10 48.6 13  
48.62 8 48.62 12  
48.64 7 48.64 11  
48.66 7 48.66 10  
48.68 7 48.68 8  
48.7 7 48.7 8  
48.72 7 48.72 8  
48.74 7 48.74 7  
48.76 6 48.76 6  
48.78 5 48.78 6  
48.8 5 48.8 5  
48.82 4 48.82 5  
48.84 3 48.84 5  
48.86 3 48.86 5  
48.88 2 48.88 5  
48.9 1 48.9 6  
48.92 1 48.92 6  
48.94 2 48.94 6  
48.96 2 48.96 5  
48.98 2 48.98 5  
49 2 49 5

49.02 2 49.02 4  
49.04 2 49.04 4  
49.06 3 49.06 3  
49.08 3 49.08 3  
49.1 3 49.1 2  
49.12 2 49.12 2  
49.14 2 49.14 2  
49.16 2 49.16 1  
49.18 1 49.18 2  
49.2 1 49.2 2  
49.22 1 49.22 2  
49.24 1 49.24 2  
49.26 1 49.26 2  
49.28 2 49.28 1  
49.3 2 49.3 1  
49.32 2 49.32 2  
49.34 2 49.34 1  
49.36 2 49.36 2  
49.38 2 49.38 1  
49.4 2 49.4 1  
49.42 2 49.42 1  
49.44 2 49.44 2

49.46 2 49.46 2  
49.48 1 49.48 2  
49.5 1 49.5 3  
49.52 1 49.52 3  
49.54 1 49.54 3  
49.56 1 49.56 3  
49.58 1 49.58 3  
49.6 1 49.6 3  
49.62 1 49.62 3  
49.64 1 49.64 3  
49.66 1 49.66 3  
49.68 1 49.68 3  
49.7 2 49.7 3  
49.72 1 49.72 2  
49.74 1 49.74 2  
49.76 1 49.76 2  
49.78 1 49.78 2  
49.8 1 49.8 1  
49.82 1 49.82 1  
49.84 1 49.84 1  
49.86 1 49.86 1  
49.88 1 49.88 1

|       |   |       |   |
|-------|---|-------|---|
| 49.9  | 1 | 49.9  | 1 |
| 49.92 | 1 | 49.92 | 1 |
| 49.94 | 1 | 49.94 | 1 |
| 49.96 | 1 | 49.96 | 1 |
| 49.98 | 1 | 49.98 | 2 |
| 50    | 1 | 50    | 2 |
| 50.02 | 0 | 50.02 | 1 |
| 50.04 | 0 | 50.04 | 1 |
| 50.06 | 1 | 50.06 | 1 |
| 50.08 | 1 | 50.08 | 1 |
| 50.1  | 1 | 50.1  | 1 |
| 50.12 | 1 | 50.12 | 1 |
| 50.14 | 1 | 50.14 | 1 |
| 50.16 | 1 | 50.16 | 1 |
| 50.18 | 1 | 50.18 | 1 |
| 50.2  | 1 | 50.2  | 1 |
| 50.22 | 1 | 50.22 | 1 |
| 50.24 | 1 | 50.24 | 1 |
| 50.26 | 1 | 50.26 | 1 |
| 50.28 | 1 | 50.28 | 1 |
| 50.3  | 1 | 50.3  | 1 |
| 50.32 | 1 | 50.32 | 1 |

50.34 1 50.34 1  
50.36 1 50.36 2  
50.38 1 50.38 1  
50.4 1 50.4 1  
50.42 1 50.42 1  
50.44 1 50.44 1  
50.46 1 50.46 1  
50.48 1 50.48 1  
50.5 1 50.5 1  
50.52 1 50.52 2  
50.54 1 50.54 2  
50.56 1 50.56 2  
50.58 0 50.58 2  
50.6 1 50.6 2  
50.62 1 50.62 2  
50.64 0 50.64 2  
50.66 0 50.66 2  
50.68 0 50.68 2  
50.7 1 50.7 2  
50.72 1 50.72 1  
50.74 1 50.74 1  
50.76 1 50.76 1

50.78 1 50.78 1  
50.8 1 50.8 1  
50.82 1 50.82 1  
50.84 2 50.84 1  
50.86 2 50.86 1  
50.88 2 50.88 1  
50.9 1 50.9 1  
50.92 1 50.92 2  
50.94 1 50.94 1  
50.96 1 50.96 1  
50.98 1 50.98 1  
51 1 51 1  
51.02 1 51.02 1  
51.04 1 51.04 1  
51.06 1 51.06 1  
51.08 1 51.08 1  
51.1 1 51.1 1  
51.12 1 51.12 1  
51.14 1 51.14 1  
51.16 1 51.16 1  
51.18 1 51.18 1  
51.2 1 51.2 1

51.22 1 51.22 1  
51.24 1 51.24 1  
51.26 1 51.26 1  
51.28 1 51.28 1  
51.3 1 51.3 1  
51.32 1 51.32 1  
51.34 1 51.34 1  
51.36 1 51.36 1  
51.38 1 51.38 1  
51.4 1 51.4 2  
51.42 1 51.42 2  
51.44 1 51.44 2  
51.46 1 51.46 2  
51.48 2 51.48 2  
51.5 2 51.5 2  
51.52 2 51.52 2  
51.54 2 51.54 1  
51.56 2 51.56 1  
51.58 1 51.58 1  
51.6 1 51.6 1  
51.62 1 51.62 2  
51.64 1 51.64 2



51.66 1 51.66 2  
51.68 2 51.68 2  
51.7 2 51.7 2  
51.72 2 51.72 2  
51.74 2 51.74 2  
51.76 2 51.76 1  
51.78 2 51.78 1  
51.8 2 51.8 1  
51.82 2 51.82 1  
51.84 2 51.84 1  
51.86 2 51.86 2  
51.88 2 51.88 2  
51.9 2 51.9 2  
51.92 2 51.92 2  
51.94 2 51.94 2  
51.96 2 51.96 3  
51.98 2 51.98 3  
52 2 52 2  
52.02 2 52.02 2  
52.04 1 52.04 2  
52.06 1 52.06 2  
52.08 1 52.08 2

52.1 1 52.1 2  
52.12 1 52.12 2  
52.14 1 52.14 2  
52.16 1 52.16 2  
52.18 1 52.18 2  
52.2 1 52.2 3  
52.22 1 52.22 3  
52.24 1 52.24 3  
52.26 1 52.26 3  
52.28 1 52.28 3  
52.3 1 52.3 3  
52.32 1 52.32 3  
52.34 1 52.34 3  
52.36 1 52.36 3  
52.38 1 52.38 2  
52.4 1 52.4 2  
52.42 2 52.42 2  
52.44 2 52.44 2  
52.46 2 52.46 2  
52.48 2 52.48 2  
52.5 2 52.5 2  
52.52 2 52.52 2

52.54 2 52.54 2  
52.56 2 52.56 2  
52.58 2 52.58 2  
52.6 2 52.6 2  
52.62 2 52.62 2  
52.64 1 52.64 2  
52.66 1 52.66 2  
52.68 1 52.68 2  
52.7 1 52.7 2  
52.72 1 52.72 2  
52.74 2 52.74 2  
52.76 2 52.76 3  
52.78 2 52.78 3  
52.8 3 52.8 3  
52.82 3 52.82 3  
52.84 3 52.84 4  
52.86 3 52.86 4  
52.88 3 52.88 4  
52.9 3 52.9 4  
52.92 2 52.92 3  
52.94 2 52.94 3  
52.96 2 52.96 3

52.98 2 52.98 3

53 2 53 3

53.02 2 53.02 3

53.04 2 53.04 3

53.06 2 53.06 3

53.08 2 53.08 3

53.1 2 53.1 3

53.12 2 53.12 3

53.14 2 53.14 3

53.16 3 53.16 3

53.18 3 53.18 2

53.2 3 53.2 2

53.22 3 53.22 2

53.24 3 53.24 2

53.26 2 53.26 2

53.28 2 53.28 2

53.3 2 53.3 2

53.32 2 53.32 2

53.34 2 53.34 3

53.36 3 53.36 2

53.38 3 53.38 3

53.4 3 53.4 3

53.42 4 53.42 3  
53.44 5 53.44 3  
53.46 5 53.46 3  
53.48 5 53.48 3  
53.5 5 53.5 3  
53.52 5 53.52 3  
53.54 5 53.54 4  
53.56 6 53.56 5  
53.58 6 53.58 5  
53.6 6 53.6 5  
53.62 6 53.62 6  
53.64 6 53.64 6  
53.66 6 53.66 7  
53.68 6 53.68 6  
53.7 7 53.7 7  
53.72 7 53.72 7  
53.74 8 53.74 8  
53.76 8 53.76 7  
53.78 8 53.78 7  
53.8 9 53.8 8  
53.82 8 53.82 8  
53.84 9 53.84 8

53.86 9 53.86 9

53.88 9 53.88 9

53.9 10 53.9 9

53.92 10 53.92 9

53.94 10 53.94 9

53.96 12 53.96 10

53.98 12 53.98 10

54 13 54 11

54.02 13 54.02 12

54.04 13 54.04 13

54.06 12 54.06 14

54.08 13 54.08 15

54.1 13 54.1 16

54.12 13 54.12 16

54.14 13 54.14 17

54.16 14 54.16 17

54.18 15 54.18 17

54.2 14 54.2 17

54.22 15 54.22 17

54.24 16 54.24 16

54.26 16 54.26 16

54.28 17 54.28 16

54.3 16 54.3 16  
54.32 16 54.32 16  
54.34 15 54.34 15  
54.36 16 54.36 14  
54.38 15 54.38 14  
54.4 14 54.4 14  
54.42 14 54.42 14  
54.44 13 54.44 15  
54.46 12 54.46 15  
54.48 12 54.48 15  
54.5 12 54.5 15  
54.52 12 54.52 15  
54.54 12 54.54 15  
54.56 13 54.56 14  
54.58 12 54.58 14  
54.6 13 54.6 13  
54.62 13 54.62 12  
54.64 12 54.64 12  
54.66 11 54.66 11  
54.68 11 54.68 11  
54.7 10 54.7 11  
54.72 9 54.72 11

54.74 10 54.74 11  
54.76 10 54.76 10  
54.78 11 54.78 11  
54.8 11 54.8 11  
54.82 12 54.82 11  
54.84 12 54.84 11  
54.86 11 54.86 12  
54.88 11 54.88 12  
54.9 10 54.9 11  
54.92 10 54.92 11  
54.94 10 54.94 11  
54.96 10 54.96 11  
54.98 10 54.98 10  
55 10 55 9  
55.02 11 55.02 10  
55.04 12 55.04 10  
55.06 13 55.06 11  
55.08 13 55.08 11  
55.1 13 55.1 11  
55.12 12 55.12 11  
55.14 12 55.14 12  
55.16 12 55.16 13



55.18 13 55.18 13  
55.2 13 55.2 14  
55.22 14 55.22 15  
55.24 14 55.24 15  
55.26 15 55.26 16  
55.28 14 55.28 16  
55.3 15 55.3 16  
55.32 15 55.32 17  
55.34 14 55.34 16  
55.36 13 55.36 15  
55.38 12 55.38 14  
55.4 12 55.4 15  
55.42 11 55.42 15  
55.44 11 55.44 15  
55.46 11 55.46 14  
55.48 10 55.48 14  
55.5 10 55.5 13  
55.52 10 55.52 12  
55.54 9 55.54 12  
55.56 9 55.56 11  
55.58 8 55.58 11  
55.6 8 55.6 10

55.62 7 55.62 9

55.64 7 55.64 8

55.66 6 55.66 7

55.68 6 55.68 7

55.7 5 55.7 6

55.72 4 55.72 5

55.74 4 55.74 4

55.76 4 55.76 4

55.78 4 55.78 4

55.8 4 55.8 4

55.82 4 55.82 4

55.84 5 55.84 4

55.86 4 55.86 4

55.88 4 55.88 5

55.9 4 55.9 5

55.92 4 55.92 5

55.94 4 55.94 5

55.96 4 55.96 5

55.98 4 55.98 4

56 3 56 4

56.02 3 56.02 4

56.04 3 56.04 4

56.06 3 56.06 3  
56.08 3 56.08 3  
56.1 4 56.1 2  
56.12 3 56.12 2  
56.14 3 56.14 2  
56.16 2 56.16 2  
56.18 3 56.18 2  
56.2 3 56.2 2  
56.22 3 56.22 2  
56.24 3 56.24 2  
56.26 3 56.26 2  
56.28 3 56.28 3  
56.3 2 56.3 2  
56.32 3 56.32 2  
56.34 3 56.34 2  
56.36 3 56.36 2  
56.38 2 56.38 2  
56.4 3 56.4 2  
56.42 2 56.42 2  
56.44 2 56.44 2  
56.46 2 56.46 2  
56.48 2 56.48 2

56.5 2 56.5 2  
56.52 2 56.52 2  
56.54 2 56.54 2  
56.56 2 56.56 2  
56.58 2 56.58 2  
56.6 2 56.6 3  
56.62 2 56.62 3  
56.64 2 56.64 3  
56.66 2 56.66 3  
56.68 3 56.68 2  
56.7 3 56.7 2  
56.72 3 56.72 3  
56.74 3 56.74 3  
56.76 2 56.76 3  
56.78 3 56.78 3  
56.8 2 56.8 3  
56.82 2 56.82 2  
56.84 2 56.84 2  
56.86 2 56.86 2  
56.88 2 56.88 2  
56.9 2 56.9 2  
56.92 2 56.92 2

56.94 2 56.94 2  
56.96 3 56.96 2  
56.98 3 56.98 2  
57 3 57 3  
57.02 3 57.02 3  
57.04 3 57.04 3  
57.06 4 57.06 3  
57.08 4 57.08 2  
57.1 3 57.1 2  
57.12 3 57.12 2  
57.14 3 57.14 1  
57.16 2 57.16 1  
57.18 2 57.18 1  
57.2 2 57.2 1  
57.22 3 57.22 2  
57.24 2 57.24 2  
57.26 3 57.26 1  
57.28 2 57.28 1  
57.3 2 57.3 1  
57.32 2 57.32 1  
57.34 2 57.34 1  
57.36 2 57.36 1

57.38 2 57.38 1  
57.4 1 57.4 1  
57.42 1 57.42 1  
57.44 1 57.44 1  
57.46 1 57.46 1  
57.48 0 57.48 1  
57.5 0 57.5 1  
57.52 0 57.52 1  
57.54 0 57.54 1  
57.56 0 57.56 1  
57.58 0 57.58 1  
57.6 0 57.6 1  
57.62 0 57.62 1  
57.64 0 57.64 1  
57.66 1 57.66 1  
57.68 1 57.68 1  
57.7 1 57.7 1  
57.72 1 57.72 1  
57.74 1 57.74 1  
57.76 1 57.76 1  
57.78 1 57.78 1  
57.8 1 57.8 1

57.82 1 57.82 1  
57.84 1 57.84 1  
57.86 1 57.86 1  
57.88 1 57.88 1  
57.9 1 57.9 1  
57.92 1 57.92 1  
57.94 1 57.94 1  
57.96 1 57.96 1  
57.98 0 57.98 1  
58 0 58 1  
58.02 0 58.02 1  
58.04 0 58.04 1  
58.06 0 58.06 1  
58.08 1 58.08 1  
58.1 1 58.1 1  
58.12 1 58.12 1  
58.14 1 58.14 2  
58.16 1 58.16 2  
58.18 1 58.18 1  
58.2 1 58.2 1  
58.22 1 58.22 1  
58.24 1 58.24 1

|       |   |       |   |
|-------|---|-------|---|
| 58.26 | 1 | 58.26 | 1 |
| 58.28 | 1 | 58.28 | 1 |
| 58.3  | 1 | 58.3  | 1 |
| 58.32 | 1 | 58.32 | 1 |
| 58.34 | 1 | 58.34 | 1 |
| 58.36 | 1 | 58.36 | 1 |
| 58.38 | 1 | 58.38 | 1 |
| 58.4  | 1 | 58.4  | 2 |
| 58.42 | 1 | 58.42 | 1 |
| 58.44 | 0 | 58.44 | 1 |
| 58.46 | 1 | 58.46 | 1 |
| 58.48 | 1 | 58.48 | 1 |
| 58.5  | 1 | 58.5  | 1 |
| 58.52 | 1 | 58.52 | 1 |
| 58.54 | 1 | 58.54 | 1 |
| 58.56 | 1 | 58.56 | 1 |
| 58.58 | 1 | 58.58 | 1 |
| 58.6  | 1 | 58.6  | 1 |
| 58.62 | 1 | 58.62 | 1 |
| 58.64 | 1 | 58.64 | 1 |
| 58.66 | 1 | 58.66 | 1 |
| 58.68 | 1 | 58.68 | 1 |



58.7 1 58.7 1  
58.72 1 58.72 1  
58.74 1 58.74 1  
58.76 1 58.76 1  
58.78 1 58.78 1  
58.8 1 58.8 1  
58.82 1 58.82 1  
58.84 1 58.84 1  
58.86 1 58.86 1  
58.88 1 58.88 1  
58.9 1 58.9 1  
58.92 1 58.92 1  
58.94 1 58.94 1  
58.96 1 58.96 1  
58.98 1 58.98 1  
59 1 59 1  
59.02 1 59.02 1  
59.04 1 59.04 1  
59.06 1 59.06 2  
59.08 1 59.08 2  
59.1 1 59.1 2  
59.12 1 59.12 2

59.14 1 59.14 2  
59.16 1 59.16 2  
59.18 1 59.18 2  
59.2 1 59.2 2  
59.22 1 59.22 2  
59.24 1 59.24 1  
59.26 1 59.26 1  
59.28 1 59.28 1  
59.3 1 59.3 1  
59.32 1 59.32 0  
59.34 1 59.34 0  
59.36 1 59.36 0  
59.38 1 59.38 1  
59.4 1 59.4 1  
59.42 1 59.42 1  
59.44 1 59.44 1  
59.46 1 59.46 2  
59.48 1 59.48 2  
59.5 1 59.5 2  
59.52 1 59.52 2  
59.54 1 59.54 2  
59.56 1 59.56 2

|       |   |       |   |
|-------|---|-------|---|
| 59.58 | 1 | 59.58 | 1 |
| 59.6  | 1 | 59.6  | 1 |
| 59.62 | 1 | 59.62 | 1 |
| 59.64 | 1 | 59.64 | 1 |
| 59.66 | 1 | 59.66 | 1 |
| 59.68 | 1 | 59.68 | 1 |
| 59.7  | 1 | 59.7  | 1 |
| 59.72 | 1 | 59.72 | 1 |
| 59.74 | 1 | 59.74 | 1 |
| 59.76 | 1 | 59.76 | 1 |
| 59.78 | 1 | 59.78 | 1 |
| 59.8  | 1 | 59.8  | 1 |
| 59.82 | 1 | 59.82 | 1 |
| 59.84 | 1 | 59.84 | 1 |
| 59.86 | 1 | 59.86 | 1 |
| 59.88 | 1 | 59.88 | 2 |
| 59.9  | 1 | 59.9  | 2 |
| 59.92 | 1 | 59.92 | 2 |
| 59.94 | 1 | 59.94 | 2 |
| 59.96 | 1 | 59.96 | 2 |
| 59.98 | 0 | 59.98 | 2 |
| 60    | 0 | 60    | 2 |

60.02 1 60.02 2  
60.04 1 60.04 1  
60.06 1 60.06 1  
60.08 1 60.08 1  
60.1 1 60.1 2  
60.12 1 60.12 2  
60.14 1 60.14 2  
60.16 1 60.16 2  
60.18 1 60.18 2  
60.2 2 60.2 2  
60.22 1 60.22 2  
60.24 1 60.24 2  
60.26 1 60.26 2  
60.28 1 60.28 1  
60.3 1 60.3 1  
60.32 1 60.32 1  
60.34 1 60.34 1  
60.36 1 60.36 1  
60.38 1 60.38 1  
60.4 1 60.4 1  
60.42 1 60.42 1  
60.44 1 60.44 1

60.46 1 60.46 1  
60.48 1 60.48 1  
60.5 1 60.5 1  
60.52 1 60.52 1  
60.54 2 60.54 1  
60.56 2 60.56 2  
60.58 2 60.58 2  
60.6 2 60.6 2  
60.62 2 60.62 1  
60.64 2 60.64 1  
60.66 2 60.66 1  
60.68 2 60.68 1  
60.7 2 60.7 1  
60.72 1 60.72 1  
60.74 1 60.74 1  
60.76 1 60.76 1  
60.78 1 60.78 1  
60.8 2 60.8 1  
60.82 2 60.82 1  
60.84 2 60.84 1  
60.86 2 60.86 1  
60.88 2 60.88 1

60.9 2 60.9 2  
60.92 2 60.92 2  
60.94 2 60.94 3  
60.96 2 60.96 3  
60.98 1 60.98 3  
61 1 61 3  
61.02 1 61.02 2  
61.04 1 61.04 3  
61.06 1 61.06 2  
61.08 1 61.08 2  
61.1 1 61.1 2  
61.12 1 61.12 1  
61.14 1 61.14 2  
61.16 1 61.16 2  
61.18 1 61.18 2  
61.2 1 61.2 2  
61.22 1 61.22 2  
61.24 1 61.24 1  
61.26 1 61.26 2  
61.28 2 61.28 1  
61.3 2 61.3 1  
61.32 2 61.32 2

61.34 2 61.34 2  
61.36 2 61.36 2  
61.38 2 61.38 2  
61.4 2 61.4 2  
61.42 2 61.42 3  
61.44 2 61.44 3  
61.46 2 61.46 3  
61.48 2 61.48 2  
61.5 2 61.5 2  
61.52 2 61.52 2  
61.54 2 61.54 2  
61.56 2 61.56 2  
61.58 2 61.58 2  
61.6 2 61.6 2  
61.62 2 61.62 2  
61.64 2 61.64 2  
61.66 1 61.66 2  
61.68 1 61.68 2  
61.7 1 61.7 2  
61.72 2 61.72 1  
61.74 2 61.74 1  
61.76 2 61.76 1

61.78 2 61.78 2  
61.8 2 61.8 2  
61.82 2 61.82 2  
61.84 2 61.84 3  
61.86 2 61.86 3  
61.88 2 61.88 3  
61.9 3 61.9 3  
61.92 3 61.92 3  
61.94 2 61.94 3  
61.96 2 61.96 2  
61.98 3 61.98 3  
62 3 62 3  
62.02 4 62.02 3  
62.04 4 62.04 3  
62.06 4 62.06 3  
62.08 4 62.08 3  
62.1 4 62.1 3  
62.12 4 62.12 4  
62.14 4 62.14 4  
62.16 4 62.16 4  
62.18 4 62.18 5  
62.2 3 62.2 5



62.22 3 62.22 5  
62.24 3 62.24 5  
62.26 4 62.26 5  
62.28 5 62.28 6  
62.3 5 62.3 5  
62.32 6 62.32 5  
62.34 6 62.34 4  
62.36 5 62.36 4  
62.38 5 62.38 5  
62.4 5 62.4 5  
62.42 5 62.42 5  
62.44 5 62.44 6  
62.46 5 62.46 6  
62.48 5 62.48 7  
62.5 5 62.5 7  
62.52 6 62.52 7  
62.54 6 62.54 7  
62.56 6 62.56 8  
62.58 7 62.58 8  
62.6 7 62.6 8  
62.62 6 62.62 9  
62.64 6 62.64 9

62.66 7 62.66 9  
62.68 7 62.68 9  
62.7 7 62.7 9  
62.72 7 62.72 9  
62.74 7 62.74 10  
62.76 8 62.76 9  
62.78 8 62.78 9  
62.8 8 62.8 9  
62.82 8 62.82 10  
62.84 9 62.84 11  
62.86 9 62.86 11  
62.88 9 62.88 12  
62.9 9 62.9 13  
62.92 10 62.92 13  
62.94 10 62.94 12  
62.96 11 62.96 12  
62.98 11 62.98 12  
63 10 63 11  
63.02 10 63.02 11  
63.04 11 63.04 11  
63.06 11 63.06 11  
63.08 10 63.08 12

63.1 11 63.1 12  
63.12 10 63.12 12  
63.14 10 63.14 12  
63.16 8 63.16 12  
63.18 8 63.18 11  
63.2 9 63.2 10  
63.22 8 63.22 9  
63.24 8 63.24 8  
63.26 9 63.26 7  
63.28 9 63.28 7  
63.3 9 63.3 6  
63.32 9 63.32 7  
63.34 8 63.34 7  
63.36 7 63.36 7  
63.38 6 63.38 6  
63.4 5 63.4 6  
63.42 4 63.42 6  
63.44 3 63.44 5  
63.46 3 63.46 5  
63.48 3 63.48 5  
63.5 3 63.5 3  
63.52 3 63.52 3

63.54 4 63.54 3  
63.56 4 63.56 3  
63.58 4 63.58 3  
63.6 4 63.6 3  
63.62 4 63.62 3  
63.64 3 63.64 3  
63.66 3 63.66 3  
63.68 3 63.68 4  
63.7 2 63.7 3  
63.72 2 63.72 3  
63.74 2 63.74 3  
63.76 2 63.76 3  
63.78 2 63.78 3  
63.8 2 63.8 2  
63.82 2 63.82 2  
63.84 2 63.84 2  
63.86 2 63.86 2  
63.88 2 63.88 2  
63.9 2 63.9 2  
63.92 2 63.92 2  
63.94 2 63.94 2  
63.96 2 63.96 2

63.98 2 63.98 2

64 2 64 2

64.02 2 64.02 2

64.04 2 64.04 2

64.06 2 64.06 2

64.08 2 64.08 2

64.1 2 64.1 2

64.12 1 64.12 2

64.14 1 64.14 2

64.16 1 64.16 2

64.18 1 64.18 1

64.2 1 64.2 1

64.22 1 64.22 1

64.24 1 64.24 1

64.26 2 64.26 1

64.28 2 64.28 2

64.3 2 64.3 2

64.32 2 64.32 2

64.34 2 64.34 3

64.36 2 64.36 3

64.38 2 64.38 3

64.4 2 64.4 3

64.42 2 64.42 3  
64.44 2 64.44 2  
64.46 2 64.46 2  
64.48 2 64.48 2  
64.5 2 64.5 2  
64.52 2 64.52 2  
64.54 2 64.54 2  
64.56 2 64.56 2  
64.58 2 64.58 2  
64.6 1 64.6 3  
64.62 2 64.62 3  
64.64 1 64.64 2  
64.66 1 64.66 2  
64.68 1 64.68 2  
64.7 1 64.7 2  
64.72 1 64.72 2  
64.74 1 64.74 2  
64.76 1 64.76 2  
64.78 1 64.78 2  
64.8 1 64.8 2  
64.82 1 64.82 2  
64.84 2 64.84 2

64.86 2 64.86 2  
64.88 2 64.88 2  
64.9 1 64.9 2  
64.92 1 64.92 1  
64.94 1 64.94 1  
64.96 1 64.96 1  
64.98 1 64.98 1  
65 1 65 1  
65.02 1 65.02 1  
65.04 1 65.04 1  
65.06 1 65.06 2  
65.08 1 65.08 2  
65.1 1 65.1 2  
65.12 1 65.12 2  
65.14 1 65.14 2  
65.16 1 65.16 2  
65.18 1 65.18 2  
65.2 1 65.2 1  
65.22 1 65.22 1  
65.24 1 65.24 1  
65.26 1 65.26 0  
65.28 1 65.28 0

65.3 1 65.3 0  
65.32 1 65.32 0  
65.34 0 65.34 0  
65.36 0 65.36 0  
65.38 1 65.38 0  
65.4 1 65.4 1  
65.42 1 65.42 1  
65.44 1 65.44 1  
65.46 1 65.46 1  
65.48 1 65.48 1  
65.5 0 65.5 1  
65.52 0 65.52 1  
65.54 0 65.54 1  
65.56 0 65.56 1  
65.58 0 65.58 2  
65.6 0 65.6 2  
65.62 0 65.62 2  
65.64 0 65.64 2  
65.66 1 65.66 2  
65.68 1 65.68 2  
65.7 1 65.7 2  
65.72 1 65.72 2



65.74 1 65.74 2  
65.76 1 65.76 2  
65.78 1 65.78 2  
65.8 1 65.8 2  
65.82 1 65.82 2  
65.84 0 65.84 2  
65.86 0 65.86 1  
65.88 0 65.88 2  
65.9 1 65.9 1  
65.92 1 65.92 1  
65.94 1 65.94 1  
65.96 2 65.96 1  
65.98 2 65.98 1  
66 2 66 1  
66.02 2 66.02 1  
66.04 2 66.04 1  
66.06 2 66.06 1  
66.08 2 66.08 1  
66.1 1 66.1 1  
66.12 1 66.12 1  
66.14 1 66.14 1  
66.16 1 66.16 1

66.18 1 66.18 1  
66.2 1 66.2 1  
66.22 1 66.22 2  
66.24 1 66.24 2  
66.26 1 66.26 1  
66.28 1 66.28 2  
66.3 1 66.3 1  
66.32 1 66.32 2  
66.34 0 66.34 2  
66.36 0 66.36 2  
66.38 0 66.38 2  
66.4 0 66.4 2  
66.42 0 66.42 2  
66.44 0 66.44 2  
66.46 1 66.46 2  
66.48 1 66.48 2  
66.5 1 66.5 2  
66.52 1 66.52 2  
66.54 1 66.54 2  
66.56 1 66.56 2  
66.58 2 66.58 2  
66.6 2 66.6 2

66.62 1 66.62 2  
66.64 1 66.64 2  
66.66 1 66.66 1  
66.68 1 66.68 1  
66.7 1 66.7 1  
66.72 1 66.72 1  
66.74 1 66.74 1  
66.76 1 66.76 1  
66.78 1 66.78 1  
66.8 1 66.8 1  
66.82 1 66.82 1  
66.84 1 66.84 2  
66.86 1 66.86 2  
66.88 1 66.88 2  
66.9 1 66.9 2  
66.92 1 66.92 2  
66.94 1 66.94 2  
66.96 1 66.96 2  
66.98 1 66.98 2  
67 1 67 2  
67.02 1 67.02 2  
67.04 1 67.04 2

67.06 1 67.06 2  
67.08 1 67.08 2  
67.1 1 67.1 2  
67.12 2 67.12 1  
67.14 2 67.14 2  
67.16 2 67.16 2  
67.18 2 67.18 1  
67.2 2 67.2 1  
67.22 2 67.22 2  
67.24 2 67.24 1  
67.26 1 67.26 1  
67.28 1 67.28 1  
67.3 1 67.3 1  
67.32 1 67.32 1  
67.34 1 67.34 1  
67.36 1 67.36 1  
67.38 1 67.38 1  
67.4 2 67.4 1  
67.42 1 67.42 1  
67.44 2 67.44 1  
67.46 2 67.46 1  
67.48 2 67.48 1

67.5 2 67.5 1  
67.52 2 67.52 1  
67.54 2 67.54 1  
67.56 2 67.56 1  
67.58 2 67.58 2  
67.6 2 67.6 2  
67.62 2 67.62 2  
67.64 2 67.64 2  
67.66 2 67.66 2  
67.68 2 67.68 2  
67.7 1 67.7 2  
67.72 1 67.72 2  
67.74 1 67.74 1  
67.76 1 67.76 1  
67.78 1 67.78 1  
67.8 1 67.8 1  
67.82 1 67.82 1  
67.84 1 67.84 1  
67.86 1 67.86 1  
67.88 1 67.88 1  
67.9 1 67.9 1  
67.92 1 67.92 1

67.94 1 67.94 1  
67.96 1 67.96 1  
67.98 1 67.98 1  
68 1 68 1  
68.02 1 68.02 1  
68.04 1 68.04 2  
68.06 1 68.06 2  
68.08 1 68.08 2  
68.1 1 68.1 2  
68.12 1 68.12 2  
68.14 1 68.14 2  
68.16 1 68.16 3  
68.18 2 68.18 3  
68.2 2 68.2 3  
68.22 2 68.22 3  
68.24 3 68.24 3  
68.26 3 68.26 3  
68.28 3 68.28 3  
68.3 2 68.3 4  
68.32 2 68.32 4  
68.34 2 68.34 4  
68.36 2 68.36 4

68.38 2 68.38 3  
68.4 2 68.4 3  
68.42 2 68.42 2  
68.44 2 68.44 2  
68.46 2 68.46 2  
68.48 3 68.48 2  
68.5 3 68.5 1  
68.52 3 68.52 1  
68.54 4 68.54 1  
68.56 4 68.56 2  
68.58 4 68.58 2  
68.6 4 68.6 2  
68.62 5 68.62 2  
68.64 5 68.64 2  
68.66 5 68.66 3  
68.68 5 68.68 3  
68.7 5 68.7 3  
68.72 5 68.72 4  
68.74 4 68.74 4  
68.76 4 68.76 4  
68.78 3 68.78 4  
68.8 3 68.8 4

68.82 3 68.82 4  
68.84 3 68.84 5  
68.86 4 68.86 5  
68.88 4 68.88 5  
68.9 4 68.9 6  
68.92 5 68.92 6  
68.94 5 68.94 6  
68.96 5 68.96 6  
68.98 6 68.98 6  
69 6 69 6  
69.02 6 69.02 5  
69.04 6 69.04 6  
69.06 6 69.06 5  
69.08 6 69.08 4  
69.1 6 69.1 5  
69.12 6 69.12 5  
69.14 6 69.14 5  
69.16 5 69.16 5  
69.18 5 69.18 4  
69.2 5 69.2 4  
69.22 4 69.22 4  
69.24 4 69.24 4



69.26 4 69.26 5  
69.28 4 69.28 6  
69.3 3 69.3 6  
69.32 3 69.32 7  
69.34 3 69.34 7  
69.36 3 69.36 6  
69.38 3 69.38 6  
69.4 4 69.4 6  
69.42 3 69.42 5  
69.44 3 69.44 5  
69.46 3 69.46 4  
69.48 3 69.48 4  
69.5 3 69.5 3  
69.52 3 69.52 3  
69.54 2 69.54 4  
69.56 2 69.56 4  
69.58 2 69.58 4  
69.6 2 69.6 4  
69.62 2 69.62 4  
69.64 2 69.64 4  
69.66 2 69.66 3  
69.68 1 69.68 4

|       |   |       |   |
|-------|---|-------|---|
| 69.7  | 2 | 69.7  | 4 |
| 69.72 | 2 | 69.72 | 4 |
| 69.74 | 3 | 69.74 | 3 |
| 69.76 | 3 | 69.76 | 3 |
| 69.78 | 3 | 69.78 | 3 |
| 69.8  | 3 | 69.8  | 3 |
| 69.82 | 4 | 69.82 | 3 |
| 69.84 | 4 | 69.84 | 3 |
| 69.86 | 4 | 69.86 | 3 |
| 69.88 | 3 | 69.88 | 3 |
| 69.9  | 4 | 69.9  | 3 |
| 69.92 | 3 | 69.92 | 4 |
| 69.94 | 4 | 69.94 | 4 |
| 69.96 | 5 | 69.96 | 3 |
| 69.98 | 5 | 69.98 | 3 |
| 70    | 5 | 70    | 3 |

UV-vis DRS analysis of P25 nanospheres and P25@AC core/shell  
nanospheres

|     |         |     |         |
|-----|---------|-----|---------|
| 800 | 0.01902 | 800 | 1.21484 |
| 799 | 0.01896 | 799 | 1.21432 |
| 798 | 0.01892 | 798 | 1.21382 |

|     |         |     |         |
|-----|---------|-----|---------|
| 797 | 0.01889 | 797 | 1.21332 |
| 796 | 0.01887 | 796 | 1.21284 |
| 795 | 0.01886 | 795 | 1.21236 |
| 794 | 0.01886 | 794 | 1.21189 |
| 793 | 0.01887 | 793 | 1.21142 |
| 792 | 0.01889 | 792 | 1.21097 |
| 791 | 0.01893 | 791 | 1.21052 |
| 790 | 0.01897 | 790 | 1.21009 |
| 789 | 0.01893 | 789 | 1.20993 |
| 788 | 0.01897 | 788 | 1.20949 |
| 787 | 0.01931 | 787 | 1.2088  |
| 786 | 0.0193  | 786 | 1.20844 |
| 785 | 0.01936 | 785 | 1.20799 |
| 784 | 0.01944 | 784 | 1.20773 |
| 783 | 0.01936 | 783 | 1.20741 |
| 782 | 0.01967 | 782 | 1.20687 |
| 781 | 0.01992 | 781 | 1.20669 |
| 780 | 0.01991 | 780 | 1.20623 |
| 779 | 0.02012 | 779 | 1.20508 |
| 778 | 0.02    | 778 | 1.20446 |
| 777 | 0.02018 | 777 | 1.20366 |
| 776 | 0.02012 | 776 | 1.20283 |

|     |         |     |         |
|-----|---------|-----|---------|
| 775 | 0.01969 | 775 | 1.20234 |
| 774 | 0.02002 | 774 | 1.20191 |
| 773 | 0.02037 | 773 | 1.20122 |
| 772 | 0.02018 | 772 | 1.2005  |
| 771 | 0.02032 | 771 | 1.19993 |
| 770 | 0.02029 | 770 | 1.19941 |
| 769 | 0.02021 | 769 | 1.19878 |
| 768 | 0.02009 | 768 | 1.19825 |
| 767 | 0.02001 | 767 | 1.19788 |
| 766 | 0.01945 | 766 | 1.1975  |
| 765 | 0.01926 | 765 | 1.19716 |
| 764 | 0.01939 | 764 | 1.19671 |
| 763 | 0.01936 | 763 | 1.19627 |
| 762 | 0.01963 | 762 | 1.1959  |
| 761 | 0.02002 | 761 | 1.19543 |
| 760 | 0.02014 | 760 | 1.19471 |
| 759 | 0.0202  | 759 | 1.19392 |
| 758 | 0.02037 | 758 | 1.19332 |
| 757 | 0.02067 | 757 | 1.19282 |
| 756 | 0.0205  | 756 | 1.1924  |
| 755 | 0.02073 | 755 | 1.192   |
| 754 | 0.02104 | 754 | 1.19147 |

|     |         |     |         |
|-----|---------|-----|---------|
| 753 | 0.02106 | 753 | 1.19073 |
| 752 | 0.02102 | 752 | 1.19014 |
| 751 | 0.02127 | 751 | 1.18957 |
| 750 | 0.02125 | 750 | 1.18911 |
| 749 | 0.02109 | 749 | 1.18871 |
| 748 | 0.02085 | 748 | 1.18828 |
| 747 | 0.02069 | 747 | 1.18762 |
| 746 | 0.02061 | 746 | 1.18709 |
| 745 | 0.02026 | 745 | 1.18645 |
| 744 | 0.02056 | 744 | 1.18589 |
| 743 | 0.02041 | 743 | 1.18525 |
| 742 | 0.02049 | 742 | 1.18484 |
| 741 | 0.02052 | 741 | 1.1842  |
| 740 | 0.02048 | 740 | 1.18366 |
| 739 | 0.02054 | 739 | 1.1831  |
| 738 | 0.02063 | 738 | 1.18277 |
| 737 | 0.02071 | 737 | 1.18242 |
| 736 | 0.02055 | 736 | 1.18198 |
| 735 | 0.02079 | 735 | 1.1815  |
| 734 | 0.02087 | 734 | 1.18116 |
| 733 | 0.02082 | 733 | 1.1805  |
| 732 | 0.02092 | 732 | 1.17996 |

|            |         |            |         |
|------------|---------|------------|---------|
| 731        | 0.02098 | 731        | 1.17925 |
| 730        | 0.02101 | 730        | 1.17887 |
| 729        | 0.02082 | 729        | 1.17841 |
| 728        | 0.02089 | 728        | 1.17775 |
| 727        | 0.02106 | 727        | 1.17727 |
| 726        | 0.0211  | 726        | 1.17681 |
| 725        | 0.02096 | 725        | 1.17632 |
| 724        | 0.02122 | 724        | 1.17576 |
| 723        | 0.02106 | 723        | 1.17524 |
| 722        | 0.0211  | 722        | 1.1748  |
| 721        | 0.02115 | 721        | 1.1743  |
| 720        | 0.02133 | 720        | 1.17393 |
| 719        | 0.02141 | 719        | 1.17362 |
| 718        | 0.0215  | 718        | 1.17325 |
| 717        | 0.02156 | 717        | 1.17278 |
| 716        | 0.02148 | 716        | 1.17231 |
| 715        | 0.02149 | 715        | 1.17179 |
| 714        | 0.02151 | 714        | 1.17143 |
| 713        | 0.02136 | 713        | 1.17072 |
| 712        | 0.02153 | 712        | 1.17018 |
| 7110.02157 |         | 7111.16969 |         |
| 710        | 0.02175 | 710        | 1.16948 |

|     |         |     |         |
|-----|---------|-----|---------|
| 709 | 0.02184 | 709 | 1.16902 |
| 708 | 0.0221  | 708 | 1.16849 |
| 707 | 0.02219 | 707 | 1.16813 |
| 706 | 0.02222 | 706 | 1.16763 |
| 705 | 0.02238 | 705 | 1.16716 |
| 704 | 0.02235 | 704 | 1.16665 |
| 703 | 0.02253 | 703 | 1.16615 |
| 702 | 0.02269 | 702 | 1.16564 |
| 701 | 0.02279 | 701 | 1.1652  |
| 700 | 0.02297 | 700 | 1.16468 |
| 699 | 0.02305 | 699 | 1.16416 |
| 698 | 0.02299 | 698 | 1.16357 |
| 697 | 0.02288 | 697 | 1.16307 |
| 696 | 0.02294 | 696 | 1.16268 |
| 695 | 0.02305 | 695 | 1.16225 |
| 694 | 0.02313 | 694 | 1.16179 |
| 693 | 0.02301 | 693 | 1.16131 |
| 692 | 0.02312 | 692 | 1.16085 |
| 691 | 0.02303 | 691 | 1.16044 |
| 690 | 0.02307 | 690 | 1.15995 |
| 689 | 0.02299 | 689 | 1.15947 |
| 688 | 0.02294 | 688 | 1.15897 |

|     |         |     |         |
|-----|---------|-----|---------|
| 687 | 0.02296 | 687 | 1.1585  |
| 686 | 0.02293 | 686 | 1.15798 |
| 685 | 0.02292 | 685 | 1.15751 |
| 684 | 0.02295 | 684 | 1.15706 |
| 683 | 0.02311 | 683 | 1.15657 |
| 682 | 0.02319 | 682 | 1.15614 |
| 681 | 0.02325 | 681 | 1.15569 |
| 680 | 0.02335 | 680 | 1.15525 |
| 679 | 0.02352 | 679 | 1.15487 |
| 678 | 0.02355 | 678 | 1.15447 |
| 677 | 0.02364 | 677 | 1.15412 |
| 676 | 0.0237  | 676 | 1.15382 |
| 675 | 0.02373 | 675 | 1.15343 |
| 674 | 0.0237  | 674 | 1.15312 |
| 673 | 0.02375 | 673 | 1.15286 |
| 672 | 0.02384 | 672 | 1.15252 |
| 671 | 0.02384 | 671 | 1.15225 |
| 670 | 0.02388 | 670 | 1.15194 |
| 669 | 0.02386 | 669 | 1.15162 |
| 668 | 0.02386 | 668 | 1.15137 |
| 667 | 0.02391 | 667 | 1.15114 |
| 666 | 0.02385 | 666 | 1.1508  |



|     |         |     |         |
|-----|---------|-----|---------|
| 665 | 0.02398 | 665 | 1.15051 |
| 664 | 0.02396 | 664 | 1.15023 |
| 663 | 0.02405 | 663 | 1.14995 |
| 662 | 0.02413 | 662 | 1.14965 |
| 661 | 0.02424 | 661 | 1.14941 |
| 660 | 0.02431 | 660 | 1.14915 |
| 659 | 0.02443 | 659 | 1.14884 |
| 658 | 0.02439 | 658 | 1.14849 |
| 657 | 0.02438 | 657 | 1.14817 |
| 656 | 0.02442 | 656 | 1.1479  |
| 655 | 0.02453 | 655 | 1.14758 |
| 654 | 0.02463 | 654 | 1.14735 |
| 653 | 0.02485 | 653 | 1.14712 |
| 652 | 0.025   | 652 | 1.14679 |
| 651 | 0.0251  | 651 | 1.14659 |
| 650 | 0.02511 | 650 | 1.14633 |
| 649 | 0.02517 | 649 | 1.1461  |
| 648 | 0.02521 | 648 | 1.14594 |
| 647 | 0.02522 | 647 | 1.14569 |
| 646 | 0.02522 | 646 | 1.14541 |
| 645 | 0.02529 | 645 | 1.14518 |
| 644 | 0.02529 | 644 | 1.14489 |

|     |         |     |         |
|-----|---------|-----|---------|
| 643 | 0.02544 | 643 | 1.14468 |
| 642 | 0.02554 | 642 | 1.14434 |
| 641 | 0.02552 | 641 | 1.14409 |
| 640 | 0.02558 | 640 | 1.14374 |
| 639 | 0.02559 | 639 | 1.14337 |
| 638 | 0.02564 | 638 | 1.1431  |
| 637 | 0.02576 | 637 | 1.14276 |
| 636 | 0.02596 | 636 | 1.14241 |
| 635 | 0.02617 | 635 | 1.14196 |
| 634 | 0.02639 | 634 | 1.14162 |
| 633 | 0.02658 | 633 | 1.14129 |
| 632 | 0.0267  | 632 | 1.14085 |
| 631 | 0.0269  | 631 | 1.14051 |
| 630 | 0.02701 | 630 | 1.1401  |
| 629 | 0.02718 | 629 | 1.13971 |
| 628 | 0.02725 | 628 | 1.13939 |
| 627 | 0.02727 | 627 | 1.13907 |
| 626 | 0.02726 | 626 | 1.13878 |
| 625 | 0.02737 | 625 | 1.13839 |
| 624 | 0.02735 | 624 | 1.13802 |
| 623 | 0.02738 | 623 | 1.13765 |
| 622 | 0.02738 | 622 | 1.13731 |

|      |         |      |         |
|------|---------|------|---------|
| 621  | 0.02727 | 621  | 1.13706 |
| 620  | 0.02728 | 620  | 1.13676 |
| 619  | 0.02721 | 619  | 1.13644 |
| 618  | 0.02735 | 618  | 1.1362  |
| 617  | 0.02751 | 617  | 1.13585 |
| 616  | 0.02766 | 616  | 1.13557 |
| 615  | 0.02777 | 615  | 1.1353  |
| 614  | 0.02791 | 614  | 1.13508 |
| 613  | 0.02803 | 613  | 1.13484 |
| 612  | 0.02816 | 612  | 1.13453 |
| 6110 | 0.0284  | 6111 | 1.13435 |
| 610  | 0.0285  | 610  | 1.13423 |
| 609  | 0.0285  | 609  | 1.13414 |
| 608  | 0.02854 | 608  | 1.13415 |
| 607  | 0.02863 | 607  | 1.13415 |
| 606  | 0.02866 | 606  | 1.13422 |
| 605  | 0.02875 | 605  | 1.13429 |
| 604  | 0.0288  | 604  | 1.1344  |
| 603  | 0.029   | 603  | 1.13452 |
| 602  | 0.02909 | 602  | 1.13473 |
| 601  | 0.0292  | 601  | 1.13493 |
| 600  | 0.02938 | 600  | 1.13515 |

|     |         |     |         |
|-----|---------|-----|---------|
| 599 | 0.02944 | 599 | 1.13527 |
| 598 | 0.02965 | 598 | 1.13547 |
| 597 | 0.02992 | 597 | 1.13563 |
| 596 | 0.03001 | 596 | 1.13579 |
| 595 | 0.03017 | 595 | 1.13591 |
| 594 | 0.03033 | 594 | 1.13591 |
| 593 | 0.03048 | 593 | 1.13592 |
| 592 | 0.03055 | 592 | 1.13578 |
| 591 | 0.0307  | 591 | 1.13575 |
| 590 | 0.0308  | 590 | 1.13565 |
| 589 | 0.0309  | 589 | 1.13561 |
| 588 | 0.03098 | 588 | 1.13546 |
| 587 | 0.03108 | 587 | 1.13524 |
| 586 | 0.03125 | 586 | 1.13508 |
| 585 | 0.0315  | 585 | 1.13502 |
| 584 | 0.03173 | 584 | 1.13492 |
| 583 | 0.0319  | 583 | 1.13473 |
| 582 | 0.03199 | 582 | 1.13462 |
| 581 | 0.03216 | 581 | 1.13464 |
| 580 | 0.03226 | 580 | 1.13464 |
| 579 | 0.03238 | 579 | 1.1347  |
| 578 | 0.03255 | 578 | 1.13471 |

|     |         |     |         |
|-----|---------|-----|---------|
| 577 | 0.03276 | 577 | 1.13476 |
| 576 | 0.03274 | 576 | 1.1348  |
| 575 | 0.03283 | 575 | 1.13477 |
| 574 | 0.03294 | 574 | 1.13481 |
| 573 | 0.033   | 573 | 1.13473 |
| 572 | 0.0331  | 572 | 1.1347  |
| 571 | 0.03309 | 571 | 1.13468 |
| 570 | 0.03317 | 570 | 1.13468 |
| 569 | 0.03329 | 569 | 1.13469 |
| 568 | 0.0332  | 568 | 1.13457 |
| 567 | 0.03341 | 567 | 1.13456 |
| 566 | 0.03359 | 566 | 1.13467 |
| 565 | 0.03372 | 565 | 1.13471 |
| 564 | 0.03379 | 564 | 1.13468 |
| 563 | 0.03385 | 563 | 1.1346  |
| 562 | 0.03401 | 562 | 1.13467 |
| 561 | 0.03407 | 561 | 1.13476 |
| 560 | 0.03437 | 560 | 1.13477 |
| 559 | 0.03458 | 559 | 1.13472 |
| 558 | 0.03474 | 558 | 1.13463 |
| 557 | 0.03492 | 557 | 1.1348  |
| 556 | 0.03505 | 556 | 1.13492 |

|     |         |     |         |
|-----|---------|-----|---------|
| 555 | 0.0352  | 555 | 1.13491 |
| 554 | 0.03535 | 554 | 1.13485 |
| 553 | 0.0355  | 553 | 1.13479 |
| 552 | 0.03573 | 552 | 1.13484 |
| 551 | 0.03573 | 551 | 1.13473 |
| 550 | 0.03597 | 550 | 1.1347  |
| 549 | 0.03621 | 549 | 1.13463 |
| 548 | 0.0363  | 548 | 1.13467 |
| 547 | 0.03652 | 547 | 1.13474 |
| 546 | 0.03664 | 546 | 1.13484 |
| 545 | 0.03681 | 545 | 1.13489 |
| 544 | 0.03691 | 544 | 1.13505 |
| 543 | 0.03708 | 543 | 1.13517 |
| 542 | 0.03717 | 542 | 1.13525 |
| 541 | 0.03727 | 541 | 1.13524 |
| 540 | 0.03759 | 540 | 1.13535 |
| 539 | 0.03769 | 539 | 1.13545 |
| 538 | 0.03788 | 538 | 1.1357  |
| 537 | 0.03808 | 537 | 1.136   |
| 536 | 0.03815 | 536 | 1.13621 |
| 535 | 0.03825 | 535 | 1.1363  |
| 534 | 0.03848 | 534 | 1.13643 |

|     |         |     |         |
|-----|---------|-----|---------|
| 533 | 0.03868 | 533 | 1.13675 |
| 532 | 0.03876 | 532 | 1.13695 |
| 531 | 0.03886 | 531 | 1.13715 |
| 530 | 0.03911 | 530 | 1.13733 |
| 529 | 0.03937 | 529 | 1.13764 |
| 528 | 0.03947 | 528 | 1.1379  |
| 527 | 0.03966 | 527 | 1.13818 |
| 526 | 0.03977 | 526 | 1.13852 |
| 525 | 0.04    | 525 | 1.13882 |
| 524 | 0.04016 | 524 | 1.13914 |
| 523 | 0.04043 | 523 | 1.13944 |
| 522 | 0.04046 | 522 | 1.13966 |
| 521 | 0.04069 | 521 | 1.13985 |
| 520 | 0.04105 | 520 | 1.14025 |
| 519 | 0.04132 | 519 | 1.1405  |
| 518 | 0.04155 | 518 | 1.14079 |
| 517 | 0.04173 | 517 | 1.14118 |
| 516 | 0.04183 | 516 | 1.14162 |
| 515 | 0.04199 | 515 | 1.14199 |
| 514 | 0.04224 | 514 | 1.14236 |
| 513 | 0.04237 | 513 | 1.1428  |
| 512 | 0.04249 | 512 | 1.1433  |

5110.04262 5111.14367

510 0.0427 510 1.14403

509 0.04283 509 1.14434

508 0.04279 508 1.14465

507 0.04305 507 1.14488

506 0.0432 506 1.14518

505 0.0434 505 1.14553

504 0.04355 504 1.14585

503 0.04373 503 1.14625

502 0.04384 502 1.14664

501 0.04411 501 1.14699

500 0.04429 500 1.14738

499 0.04452 499 1.14777

498 0.04473 498 1.14816

497 0.04505 497 1.14855

496 0.04541 496 1.14907

495 0.04567 495 1.1495

494 0.04599 494 1.14988

493 0.04621 493 1.15033

492 0.0464 492 1.15083

491 0.0466 491 1.15111

490 0.04676 490 1.1516



|     |         |     |         |
|-----|---------|-----|---------|
| 489 | 0.04685 | 489 | 1.15192 |
| 488 | 0.04697 | 488 | 1.15243 |
| 487 | 0.0473  | 487 | 1.15286 |
| 486 | 0.04765 | 486 | 1.1535  |
| 485 | 0.04785 | 485 | 1.15403 |
| 484 | 0.04805 | 484 | 1.15459 |
| 483 | 0.04832 | 483 | 1.15532 |
| 482 | 0.04845 | 482 | 1.156   |
| 481 | 0.04853 | 481 | 1.15669 |
| 480 | 0.04867 | 480 | 1.15727 |
| 479 | 0.04915 | 479 | 1.15786 |
| 478 | 0.04932 | 478 | 1.15836 |
| 477 | 0.04971 | 477 | 1.15896 |
| 476 | 0.05005 | 476 | 1.15964 |
| 475 | 0.05014 | 475 | 1.16018 |
| 474 | 0.0504  | 474 | 1.16061 |
| 473 | 0.05078 | 473 | 1.16111 |
| 472 | 0.05113 | 472 | 1.16175 |
| 471 | 0.05139 | 471 | 1.16228 |
| 470 | 0.05152 | 470 | 1.16294 |
| 469 | 0.05167 | 469 | 1.16361 |
| 468 | 0.05198 | 468 | 1.16438 |

|     |         |     |         |
|-----|---------|-----|---------|
| 467 | 0.05237 | 467 | 1.16496 |
| 466 | 0.05291 | 466 | 1.16569 |
| 465 | 0.05328 | 465 | 1.16637 |
| 464 | 0.05362 | 464 | 1.16711 |
| 463 | 0.05421 | 463 | 1.16797 |
| 462 | 0.05447 | 462 | 1.16864 |
| 461 | 0.0548  | 461 | 1.16932 |
| 460 | 0.05526 | 460 | 1.16984 |
| 459 | 0.05578 | 459 | 1.1705  |
| 458 | 0.05606 | 458 | 1.17109 |
| 457 | 0.05663 | 457 | 1.17189 |
| 456 | 0.0569  | 456 | 1.17258 |
| 455 | 0.05725 | 455 | 1.17325 |
| 454 | 0.05768 | 454 | 1.1738  |
| 453 | 0.05807 | 453 | 1.17462 |
| 452 | 0.05848 | 452 | 1.17541 |
| 451 | 0.05859 | 451 | 1.17619 |
| 450 | 0.05887 | 450 | 1.17705 |
| 449 | 0.05912 | 449 | 1.17784 |
| 448 | 0.05958 | 448 | 1.17867 |
| 447 | 0.05986 | 447 | 1.17947 |
| 446 | 0.06044 | 446 | 1.18054 |

|     |         |     |         |
|-----|---------|-----|---------|
| 445 | 0.06078 | 445 | 1.18139 |
| 444 | 0.06114 | 444 | 1.18214 |
| 443 | 0.06174 | 443 | 1.18305 |
| 442 | 0.06223 | 442 | 1.18383 |
| 441 | 0.06259 | 441 | 1.18469 |
| 440 | 0.06319 | 440 | 1.1855  |
| 439 | 0.06384 | 439 | 1.18633 |
| 438 | 0.06438 | 438 | 1.18712 |
| 437 | 0.06498 | 437 | 1.18809 |
| 436 | 0.06554 | 436 | 1.18879 |
| 435 | 0.06616 | 435 | 1.18966 |
| 434 | 0.06677 | 434 | 1.1905  |
| 433 | 0.06744 | 433 | 1.19141 |
| 432 | 0.06842 | 432 | 1.19217 |
| 431 | 0.06922 | 431 | 1.19314 |
| 430 | 0.07019 | 430 | 1.1939  |
| 429 | 0.07102 | 429 | 1.19479 |
| 428 | 0.07197 | 428 | 1.19582 |
| 427 | 0.07278 | 427 | 1.19664 |
| 426 | 0.07399 | 426 | 1.19756 |
| 425 | 0.07503 | 425 | 1.19824 |
| 424 | 0.07624 | 424 | 1.19913 |

|      |         |      |         |
|------|---------|------|---------|
| 423  | 0.07754 | 423  | 1.20009 |
| 422  | 0.07876 | 422  | 1.20111 |
| 421  | 0.07998 | 421  | 1.20225 |
| 420  | 0.08148 | 420  | 1.20325 |
| 419  | 0.08272 | 419  | 1.20409 |
| 418  | 0.08427 | 418  | 1.20483 |
| 417  | 0.08578 | 417  | 1.20544 |
| 416  | 0.08738 | 416  | 1.20629 |
| 415  | 0.0891  | 415  | 1.20725 |
| 414  | 0.09143 | 414  | 1.20806 |
| 413  | 0.09391 | 413  | 1.20879 |
| 412  | 0.09653 | 412  | 1.20949 |
| 4110 | 0.09916 | 4111 | 1.21038 |
| 410  | 0.102   | 410  | 1.21124 |
| 409  | 0.10505 | 409  | 1.21205 |
| 408  | 0.10873 | 408  | 1.21292 |
| 407  | 0.1124  | 407  | 1.21341 |
| 406  | 0.11672 | 406  | 1.21406 |
| 405  | 0.12107 | 405  | 1.21468 |
| 404  | 0.12577 | 404  | 1.21543 |
| 403  | 0.1306  | 403  | 1.21626 |
| 402  | 0.13603 | 402  | 1.21715 |

|     |         |     |         |
|-----|---------|-----|---------|
| 401 | 0.14186 | 401 | 1.218   |
| 400 | 0.14806 | 400 | 1.21862 |
| 399 | 0.15425 | 399 | 1.21928 |
| 398 | 0.1617  | 398 | 1.21989 |
| 397 | 0.16894 | 397 | 1.22073 |
| 396 | 0.1772  | 396 | 1.22168 |
| 395 | 0.18618 | 395 | 1.22223 |
| 394 | 0.19592 | 394 | 1.22265 |
| 393 | 0.20574 | 393 | 1.22328 |
| 392 | 0.21638 | 392 | 1.22414 |
| 391 | 0.2278  | 391 | 1.22497 |
| 390 | 0.24002 | 390 | 1.22573 |
| 389 | 0.25304 | 389 | 1.22652 |
| 388 | 0.26723 | 388 | 1.22693 |
| 387 | 0.28265 | 387 | 1.22711 |
| 386 | 0.29908 | 386 | 1.22772 |
| 385 | 0.31665 | 385 | 1.22834 |
| 384 | 0.33523 | 384 | 1.22907 |
| 383 | 0.35464 | 383 | 1.22998 |
| 382 | 0.37554 | 382 | 1.23076 |
| 381 | 0.39765 | 381 | 1.23149 |
| 380 | 0.42143 | 380 | 1.23221 |

|     |         |     |         |
|-----|---------|-----|---------|
| 379 | 0.4459  | 379 | 1.23355 |
| 378 | 0.47157 | 378 | 1.23446 |
| 377 | 0.49877 | 377 | 1.23512 |
| 376 | 0.52722 | 376 | 1.23595 |
| 375 | 0.55662 | 375 | 1.23681 |
| 374 | 0.58637 | 374 | 1.23773 |
| 373 | 0.61659 | 373 | 1.23888 |
| 372 | 0.64793 | 372 | 1.2404  |
| 371 | 0.67999 | 371 | 1.2419  |
| 370 | 0.7125  | 370 | 1.2435  |
| 369 | 0.74606 | 369 | 1.24468 |
| 368 | 0.77903 | 368 | 1.24563 |
| 367 | 0.81105 | 367 | 1.24722 |
| 366 | 0.84241 | 366 | 1.2492  |
| 365 | 0.87476 | 365 | 1.25124 |
| 364 | 0.90484 | 364 | 1.25311 |
| 363 | 0.93375 | 363 | 1.25538 |
| 362 | 0.96232 | 362 | 1.2576  |
| 361 | 0.98914 | 361 | 1.25918 |
| 360 | 1.01512 | 360 | 1.26188 |
| 359 | 1.03868 | 359 | 1.26389 |
| 358 | 1.06064 | 358 | 1.26589 |

|     |         |     |         |
|-----|---------|-----|---------|
| 357 | 1.0805  | 357 | 1.26781 |
| 356 | 1.0974  | 356 | 1.27098 |
| 355 | 1.11334 | 355 | 1.27384 |
| 354 | 1.12815 | 354 | 1.27711 |
| 353 | 1.14174 | 353 | 1.27971 |
| 352 | 1.15315 | 352 | 1.28209 |
| 351 | 1.16329 | 351 | 1.28471 |
| 350 | 1.17126 | 350 | 1.28705 |
| 349 | 1.17939 | 349 | 1.28891 |
| 348 | 1.18417 | 348 | 1.29164 |
| 347 | 1.18864 | 347 | 1.29417 |
| 346 | 1.19152 | 346 | 1.29636 |
| 345 | 1.19438 | 345 | 1.29839 |
| 344 | 1.19592 | 344 | 1.29951 |
| 343 | 1.19609 | 343 | 1.30112 |
| 342 | 1.19637 | 342 | 1.30231 |
| 341 | 1.19648 | 341 | 1.30309 |
| 340 | 1.19524 | 340 | 1.30437 |
| 339 | 1.19302 | 339 | 1.30524 |
| 338 | 1.19048 | 338 | 1.30635 |
| 337 | 1.18831 | 337 | 1.30687 |
| 336 | 1.18559 | 336 | 1.30781 |

|     |         |     |         |
|-----|---------|-----|---------|
| 335 | 1.18467 | 335 | 1.30773 |
| 334 | 1.18389 | 334 | 1.3076  |
| 333 | 1.18183 | 333 | 1.30637 |
| 332 | 1.17935 | 332 | 1.30576 |
| 331 | 1.17865 | 331 | 1.30485 |
| 330 | 1.17765 | 330 | 1.30393 |
| 329 | 1.17833 | 329 | 1.30311 |
| 328 | 1.17657 | 328 | 1.30279 |
| 327 | 1.17573 | 327 | 1.30132 |
| 326 | 1.17262 | 326 | 1.2999  |
| 325 | 1.17176 | 325 | 1.29856 |
| 324 | 1.17046 | 324 | 1.29712 |
| 323 | 1.16943 | 323 | 1.29657 |
| 322 | 1.16859 | 322 | 1.29579 |
| 321 | 1.16785 | 321 | 1.29537 |
| 320 | 1.16594 | 320 | 1.29482 |
| 319 | 1.16477 | 319 | 1.29472 |
| 318 | 1.16474 | 318 | 1.29373 |
| 317 | 1.16479 | 317 | 1.29318 |
| 316 | 1.16277 | 316 | 1.29233 |
| 315 | 1.16208 | 315 | 1.29138 |
| 314 | 1.16141 | 314 | 1.29096 |



|     |         |     |         |
|-----|---------|-----|---------|
| 313 | 1.1604  | 313 | 1.29002 |
| 312 | 1.15998 | 312 | 1.2896  |
| 311 | 1.1598  | 311 | 1.28871 |
| 310 | 1.15862 | 310 | 1.28827 |
| 309 | 1.15664 | 309 | 1.28767 |
| 308 | 1.1537  | 308 | 1.28697 |
| 307 | 1.15278 | 307 | 1.28588 |
| 306 | 1.15066 | 306 | 1.28527 |
| 305 | 1.14968 | 305 | 1.28396 |
| 304 | 1.14979 | 304 | 1.28298 |
| 303 | 1.14978 | 303 | 1.28246 |
| 302 | 1.1487  | 302 | 1.28126 |
| 301 | 1.14755 | 301 | 1.28021 |
| 300 | 1.14761 | 300 | 1.27869 |
| 299 | 1.14705 | 299 | 1.27752 |
| 298 | 1.14753 | 298 | 1.27624 |
| 297 | 1.14722 | 297 | 1.27531 |
| 296 | 1.1464  | 296 | 1.2739  |
| 295 | 1.14474 | 295 | 1.2731  |
| 294 | 1.14409 | 294 | 1.27247 |
| 293 | 1.14272 | 293 | 1.27153 |
| 292 | 1.14083 | 292 | 1.27094 |

|     |         |     |         |
|-----|---------|-----|---------|
| 291 | 1.13994 | 291 | 1.2701  |
| 290 | 1.13809 | 290 | 1.26886 |
| 289 | 1.13597 | 289 | 1.26831 |
| 288 | 1.13498 | 288 | 1.26765 |
| 287 | 1.13575 | 287 | 1.26708 |
| 286 | 1.13453 | 286 | 1.26659 |
| 285 | 1.13366 | 285 | 1.26601 |
| 284 | 1.134   | 284 | 1.26597 |
| 283 | 1.13361 | 283 | 1.26575 |
| 282 | 1.13401 | 282 | 1.26509 |
| 281 | 1.13456 | 281 | 1.26474 |
| 280 | 1.13625 | 280 | 1.26437 |
| 279 | 1.13612 | 279 | 1.26454 |
| 278 | 1.13733 | 278 | 1.26468 |
| 277 | 1.13696 | 277 | 1.26519 |
| 276 | 1.13658 | 276 | 1.26532 |
| 275 | 1.13505 | 275 | 1.26559 |
| 274 | 1.13542 | 274 | 1.26588 |
| 273 | 1.13495 | 273 | 1.26608 |
| 272 | 1.13488 | 272 | 1.26621 |
| 271 | 1.13575 | 271 | 1.26646 |
| 270 | 1.13529 | 270 | 1.26633 |

|     |         |     |         |
|-----|---------|-----|---------|
| 269 | 1.1346  | 269 | 1.26638 |
| 268 | 1.13389 | 268 | 1.26638 |
| 267 | 1.13373 | 267 | 1.26675 |
| 266 | 1.13226 | 266 | 1.26695 |
| 265 | 1.13212 | 265 | 1.26706 |
| 264 | 1.13255 | 264 | 1.26702 |
| 263 | 1.13314 | 263 | 1.26698 |
| 262 | 1.13347 | 262 | 1.26733 |
| 261 | 1.1343  | 261 | 1.26784 |
| 260 | 1.13504 | 260 | 1.26828 |
| 259 | 1.13487 | 259 | 1.26905 |
| 258 | 1.1362  | 258 | 1.26997 |
| 257 | 1.13626 | 257 | 1.27124 |
| 256 | 1.13817 | 256 | 1.27212 |
| 255 | 1.13871 | 255 | 1.27323 |
| 254 | 1.14061 | 254 | 1.2751  |
| 253 | 1.14243 | 253 | 1.27699 |
| 252 | 1.14426 | 252 | 1.27867 |
| 251 | 1.14617 | 251 | 1.28083 |
| 250 | 1.14701 | 250 | 1.28264 |
| 249 | 1.14731 | 249 | 1.2846  |
| 248 | 1.14869 | 248 | 1.28709 |

|     |         |     |         |
|-----|---------|-----|---------|
| 247 | 1.15051 | 247 | 1.28951 |
| 246 | 1.15163 | 246 | 1.29183 |
| 245 | 1.15363 | 245 | 1.29404 |
| 244 | 1.15549 | 244 | 1.29639 |
| 243 | 1.15796 | 243 | 1.29863 |
| 242 | 1.15973 | 242 | 1.30099 |
| 241 | 1.1621  | 241 | 1.30347 |
| 240 | 1.16361 | 240 | 1.30543 |
| 239 | 1.16465 | 239 | 1.30755 |
| 238 | 1.16589 | 238 | 1.3092  |
| 237 | 1.16698 | 237 | 1.31096 |
| 236 | 1.16832 | 236 | 1.31203 |
| 235 | 1.16997 | 235 | 1.31365 |
| 234 | 1.17204 | 234 | 1.31567 |
| 233 | 1.17352 | 233 | 1.31718 |
| 232 | 1.17323 | 232 | 1.3186  |
| 231 | 1.17424 | 231 | 1.32033 |
| 230 | 1.17448 | 230 | 1.32251 |
| 229 | 1.17627 | 229 | 1.32428 |
| 228 | 1.17881 | 228 | 1.32611 |
| 227 | 1.18031 | 227 | 1.32843 |
| 226 | 1.1802  | 226 | 1.33018 |

|            |         |            |         |
|------------|---------|------------|---------|
| 225        | 1.18276 | 225        | 1.33236 |
| 224        | 1.18506 | 224        | 1.3345  |
| 223        | 1.18348 | 223        | 1.33751 |
| 222        | 1.18518 | 222        | 1.3396  |
| 221        | 1.18516 | 221        | 1.34155 |
| 220        | 1.18262 | 220        | 1.34368 |
| 219        | 1.17741 | 219        | 1.34602 |
| 218        | 1.17064 | 218        | 1.34772 |
| 217        | 1.16987 | 217        | 1.34853 |
| 216        | 1.17092 | 216        | 1.34912 |
| 215        | 1.16743 | 215        | 1.3516  |
| 214        | 1.16529 | 214        | 1.351   |
| 213        | 1.16343 | 213        | 1.35176 |
| 212        | 1.15903 | 212        | 1.34842 |
| 2111.16051 |         | 2111.34987 |         |
| 210        | 1.15698 | 210        | 1.34897 |
| 209        | 1.15231 | 209        | 1.3479  |
| 208        | 1.14709 | 208        | 1.34652 |
| 207        | 1.14134 | 207        | 1.34484 |
| 206        | 1.13504 | 206        | 1.34284 |
| 205        | 1.12821 | 205        | 1.34053 |
| 204        | 1.12084 | 204        | 1.33791 |

|     |         |     |         |
|-----|---------|-----|---------|
| 203 | 1.11292 | 203 | 1.33498 |
| 202 | 1.10447 | 202 | 1.33174 |
| 201 | 1.09548 | 201 | 1.32819 |
| 200 | 1.08594 | 200 | 1.32433 |
