# Supplementary material for: Bottom-up assembly of recyclable van der Waals-integrated photocatalysts towards efficient photoelectrocatalytic degradation
Source: Royal Society of Chemistry journal article supplement (doi:10.1039/d4ta07813f), 2025-01-01
Supplement: d4ta07813f2.pdf [file d4ta07813f2.pdf]

## Supplementary Information

# Bottom-up assembly of recyclable van der Waals-integrated photocatalysts towards efficient photoelectrocatalytic degradation

*Hua-Jun Chen,<sup>a,#</sup> Zhao-Ming Lu,<sup>a,#</sup> Yanling Yang,<sup>b,\*,#</sup> Xiao-Lei Shi,<sup>c,#</sup> Jin-Geng Chen,<sup>b</sup> Ze-Nan Hu,<sup>a</sup> Biying Zhang,<sup>a</sup> Yue-Feng Chen,<sup>b</sup> Yu Sun,<sup>b</sup> and Zhi-Gang Chen<sup>c,\*</sup>*

<sup>a</sup> School of Environment and Chemistry, Henan Provincial Engineering Research Centre for Catalytic Degradation and Energy Conservation, Luoyang Institute of Science and Technology, Luoyang, China.

<sup>b</sup> School of Materials Science and Engineering, Shaanxi Key Laboratory of Green Preparation and Functionalization for Inorganic Materials, Shaanxi University of Science and Technology, Xi'an, China.

<sup>c</sup> School of Chemistry and Physics, ARC Research Hub in Zero-emission Power Generation for Carbon Neutrality, and Centre for Materials Science, Queensland University of Technology, Brisbane, Queensland, Australia.

# The first four authors contributed equally to this work.

## Corresponding Authors

**Yan-Ling Yang** E-mail: yangyanling@sust.edu.cn.

**Zhi-Gang Chen** E-mail: zhigang.chen@qut.edu.au.

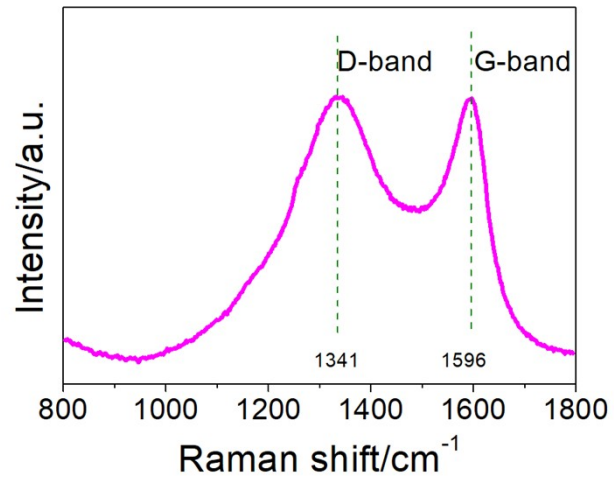

**Figure S1.** Raman spectra of P25@AC core/shell nanospheres.

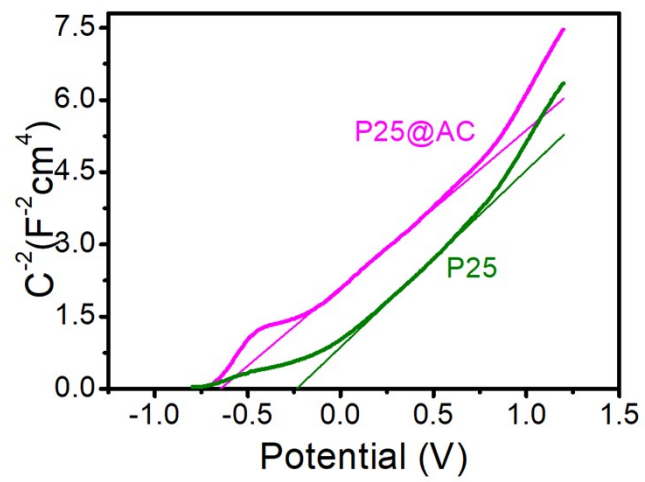

**Figure S2.** Mott-Schottky plots of P25 and  $\text{TiO}_2$ @AC core-shell nanosphere.

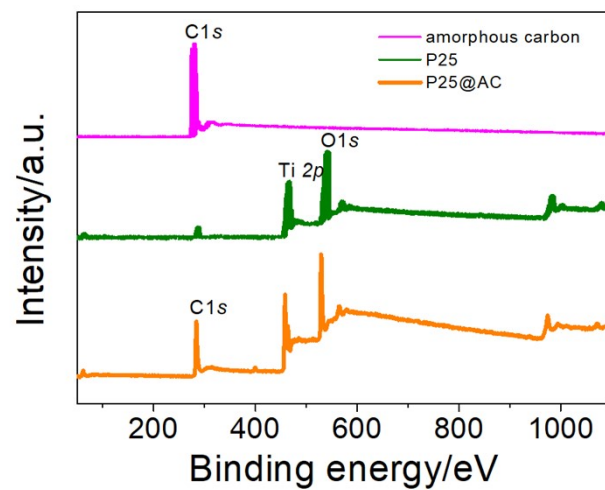

**Figure S3.** The survey XPS spectrum of amorphous carbon, commercial P25, and P25@AC core-shell nanospheres.

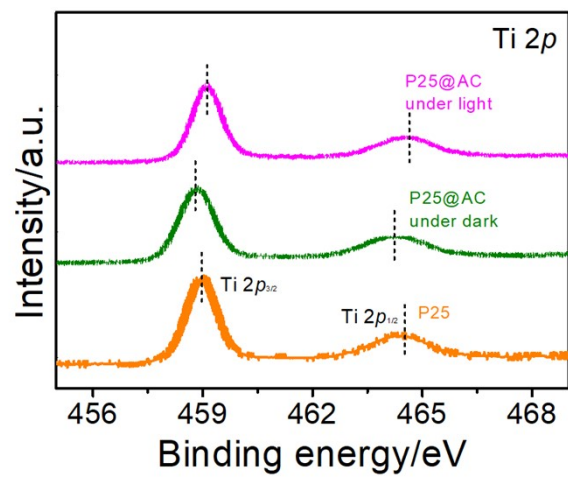

**Figure S4.** High-resolution XPS spectra of Ti 2p.

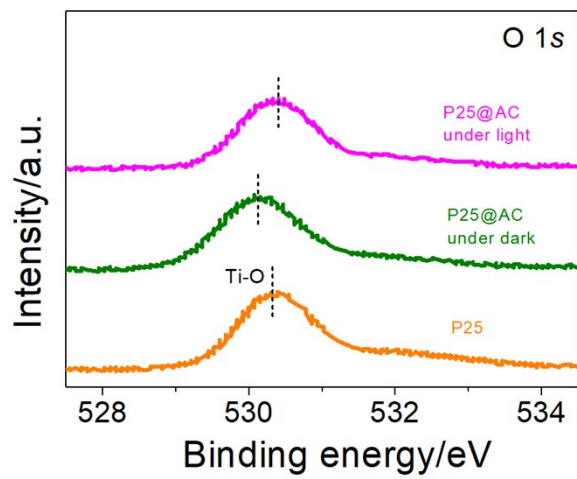

**Figure S5.** High-resolution XPS spectra of O 1s.

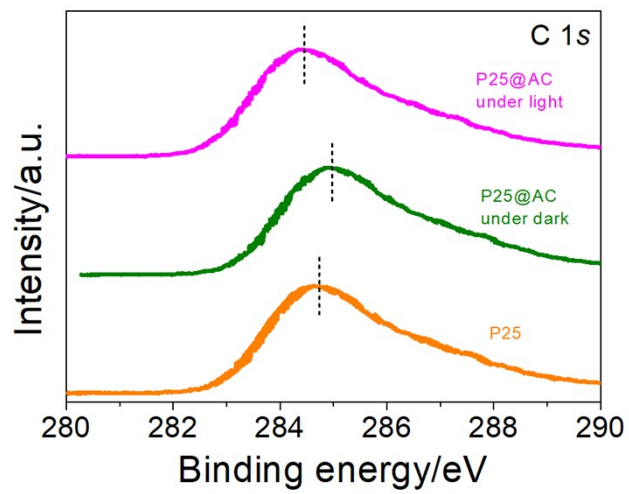

**Figure S6.** High-resolution XPS spectra of C 1s.
